# Supplementary material for: Uterotonic drug quality: an assessment of the potency of injectable uterotonic drugs purchased by simulated clients in three districts in Ghana
Source: PubMed Central journal article supplement — BMJ Open. 2012 May 3;2(3):e000431. doi: 10.1136/bmjopen-2011-000431 (PMC3346944; doi:10.1136/bmjopen-2011-000431), 2012-05-03

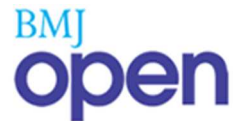

**Uterotonic Drug Quality: An Assessment of the Potency of  
Injectable Uterotonic Drugs Purchased by Simulated Clients  
in Three Districts in Ghana**

|                                 |                                                                                                                                                                                                                                                                                                                                                                                                                                                     |
|---------------------------------|-----------------------------------------------------------------------------------------------------------------------------------------------------------------------------------------------------------------------------------------------------------------------------------------------------------------------------------------------------------------------------------------------------------------------------------------------------|
| Journal:                        | <i>BMJ Open</i>                                                                                                                                                                                                                                                                                                                                                                                                                                     |
| Manuscript ID:                  | bmjopen-2011-000431                                                                                                                                                                                                                                                                                                                                                                                                                                 |
| Article Type:                   | Research                                                                                                                                                                                                                                                                                                                                                                                                                                            |
| Date Submitted by the Author:   | 04-Jan-2012                                                                                                                                                                                                                                                                                                                                                                                                                                         |
| Complete List of Authors:       | Stanton, Cynthia; Johns Hopkins Bloomberg School of Public Health, Population, Family and Reproductive Health<br>Koski, Alissa; Johns Hopkins Bloomberg School of Public Health, Department of Population, Family and Reproductive Health<br>Cofie, Patience; PATH,<br>Mirzabagi, Ellie; Johns Hopkins Bloomberg School of Public Health, Department of Population, Family and Reproductive Health<br>Grady, Breanne; PATH,<br>Brooke, Steve; PATH, |
| <b>Primary Subject Heading</b>: | Epidemiology                                                                                                                                                                                                                                                                                                                                                                                                                                        |
| Secondary Subject Heading:      | Health services research                                                                                                                                                                                                                                                                                                                                                                                                                            |
| Keywords:                       | PUBLIC HEALTH, CLINICAL PHARMACOLOGY, Quality in health care < HEALTH SERVICES ADMINISTRATION & MANAGEMENT                                                                                                                                                                                                                                                                                                                                          |
|                                 |                                                                                                                                                                                                                                                                                                                                                                                                                                                     |

SCHOLARONE™  
Manuscripts

only

1  
2  
3 **Title:** Uterotonic Drug Quality: An Assessment of the Potency of Injectable Uterotonic  
4  
5  
6 Drugs Purchased by Simulated Clients in Three Districts in Ghana

7  
8 **Running head:** Uterotonic Drug Potency in Ghana  
9

10  
11  
12 **Authors:**

13  
14  
15 Cynthia K. Stanton, Associate Professor, Department of Population, Family and  
16  
17 Reproductive Health, The Johns Hopkins Bloomberg School of Public Health, Baltimore,  
18  
19 Maryland, USA

20  
21  
22 Alissa Koski, Research Coordinator, Department of Population, Family and Reproductive  
23  
24 Health, The Johns Hopkins Bloomberg School of Public Health, Baltimore, Maryland,  
25  
26 USA

27  
28  
29 Patience Cofie, PATH, Accra, Ghana

30  
31  
32 Ellie Mirzabagi, Research Coordinator, Department of Population, Family and  
33  
34 Reproductive Health, The Johns Hopkins Bloomberg School of Public Health, Baltimore,  
35  
36 Maryland, USA

37  
38  
39 Breanne Grady, Project Coordinator, PATH, Seattle, Washington, USA

40  
41  
42 Steve Brooke, Commercialization Advisor, PATH, Seattle, Washington

43  
44  
45  
46 **Corresponding Author:** Cynthia K. Stanton; cstanton@jhsph.edu  
47

48  
49  
50 **Word Count:** Abstract 284; Text 3,251

51  
52  
53 N of Tables: 5

54  
55  
56 N of Figures: 2

1  
2  
3 **Key words:** quality medicines, uterotonics, potency, oxytocin, ergometrine  
4  
5  
6  
7

## 8 **Summary**

### 9 **Article focus:**

- 10  
11  
12  
13
  - 14 • The need for high quality uterotonic drugs for the prevention of maternal
  - 15 mortality and morbidity in poor countries is indisputable.
  - 16 • Best practice for long-term storage for all injectable uterotonics is refrigeration,
  - 17 which is a key logistical constraint for scale-up of postpartum haemorrhage
  - 18 reduction strategies and is a general challenge for maternity services without
  - 19 consistent electricity.
  - 20 • The objective of the study was to assess the population's access to uterotonic
  - 21 drugs and to assess the chemical potency of ampoules of oxytocin and
  - 22 ergometrine available to the population.
  - 23
  - 24
  - 25

### 26 **Key messages:**

- 27  
28
  - 29 • Quality of uterotonics is likely a serious problem in Ghana; 89% of all ampoules
  - 30 tested in this study did not meet the specifications for active ingredient. The low
  - 31 level of active ingredient in these ampoules is not due to old drugs; only 2% of
  - 32 these ampoules had expired.
  - 33 • There is little enforcement of the restriction against chemical shops selling
  - 34 uterotonics or of the sale of unregistered uterotonics in these districts;
  - 35 • Inactive uterotonics are not restricted to the private sector; uterotonics outside
  - 36 specification were purchased from private and public sources. It is also clear that
  - 37 public and private sources procure unregistered uterotonics.
  - 38
  - 39
  - 40
  - 41

### 42 **Strengths and Limitations**

- 43  
44
  - 45 • Strength: An up-to-date listing of points of sale was compiled specifically for this
  - 46 study, a sample of randomly selected sites was visited and in two of three
  - 47 districts the selected points of sale represented all the existing, accessible
  - 48 chemical sellers and pharmacies.
  - 49 • Strength: The simulated client approach prevents possible bias in the selection of
  - 50 ampoules to be sent for chemical testing.
  - 51 • Limitation: The number of points of sale selected for visit (25 per district) was
  - 52 based on practical considerations and resulted in a relatively small sample of
  - 53 ampoules available for chemical testing.
  - 54
  - 55
  - 56

1  
2  
3  
4  
5  
6  
7  
8  
9  
10  
11  
12  
13  
14  
15  
16  
17  
18  
19  
20  
21  
22  
23  
24  
25  
26  
27  
28  
29  
30  
31  
32  
33  
34  
35  
36  
37  
38  
39  
40  
41  
42  
43  
44  
45  
46  
47  
48  
49  
50  
51  
52  
53  
54  
55  
56  
57  
58  
59  
60

- Limitation: The sampling frame may not have been 100% exhaustive, given the informal nature of some drug sellers. However, study results were strikingly similar across three diverse districts, and this is unlikely to result from sampling error.

For peer review only

## ABSTRACT

### Objectives

Oxytocin, ergometrine, and misoprostol are included on the World Health Organisation Model List of Essential Medicines. Given use of uterotonics for postpartum haemorrhage and other obstetric indications, the importance of potent uterotonics is indisputable. This study assessed access to and potency of injectable uterotonics in Ghana.

### Methods

Study design involved research assistants simulating clients to purchase oxytocin and ergometrine from different sources in three contrasting districts. Drug potency was measured via chemical assay by the Ghana Food and Drugs Board.

### Findings

Sixty-nine formal points of sale were visited, from which 55 ergometrine ampoules and 46 oxytocin ampoules were purchased. None of the ergometrine ampoules were within British Pharmacopoeia specification for active ingredient, none were expired, and one showed 0% active ingredient, suggestive of a counterfeit drug. Among oxytocin ampoules purchased, only 11 (26%) were within British Pharmacopoeia specification for active ingredient and two (4%) were expired. The median percentages of active ingredients were 64% and 50% for oxytocin and ergometrine, respectively.

### Conclusion

There may be a serious problem with the quality of injectable uterotonics at the peripheral level in Ghana. Restrictions regarding the sale of unregistered drugs, and of registered drugs from unlicensed shops, are inadequately enforced. These problems likely exist elsewhere, but are not assessed as post-marketing drug quality surveillance is

1  
2  
3  
4  
5  
6  
7  
8  
9  
10  
11  
12  
13  
14  
15  
16  
17  
18  
19  
20  
21  
22  
23  
24  
25  
26  
27  
28  
29  
30  
31  
32  
33  
34  
35  
36  
37  
38  
39  
40  
41  
42  
43  
44  
45  
46  
47  
48  
49  
50  
51  
52  
53  
54  
55  
56  
57  
58  
59  
60

generally restricted to well-funded, disease specific programs relying on anti-retroviral, anti-malarial and antibiotic drugs. Maternal health programs must adopt and fund the same approach to drug quality as is standard in programs addressing infectious disease.

For peer review only

## Introduction

The most commonly used uterotonic drugs in poor countries are injectable oxytocin and ergometrine and misoprostol tablets. Injectable methylergometrine, injectable syntometrine, and ergometrine tablets are also used. Oxytocin, ergometrine, and misoprostol are included in the World Health Organisation's (WHO) Model List of Essential Medicines (1). Based on existing data, WHO considers oxytocin the drug of choice for postpartum haemorrhage prevention and treatment where refrigeration is feasible (2). Oxytocin is also included in the new WHO list of priority medicines for mothers and children for prevention of postpartum haemorrhage (3). As uterotonics are also used for other obstetric indications (induction, augmentation of labor), the importance of access to potent uterotonics throughout the antepartum and early postpartum periods is indisputable.

Given that postpartum haemorrhage is a leading direct cause of maternal death in many poor countries, large-scale efforts have focused on in-service clinical training for postpartum haemorrhage prevention and treatment which requires uterotonic drugs. However, best practice for long-term storage for all injectable uterotonics is refrigeration, which is a key logistical constraint for scale-up of postpartum haemorrhage reduction strategies and is a general challenge for maternity services without consistent electricity.

In 1993, a WHO simulation study testing the stability of injectable uterotonic drugs showed that oxytocin lost no active ingredient after 12 months under refrigeration (4°–8° Celsius), lost 3%–7% active ingredient after 12 months at 21°–25° Celsius, lost 9%–19%

1  
2  
3 active ingredient after 12 months at 30° Celsius, and was unaffected by exposure to light.  
4  
5 Ergometrine was shown to be much less stable, losing 5% of its active ingredient after 12  
6  
7 months at 4°–8° Celsius when stored in the dark, losing more than 90% of its active  
8  
9 ingredient when stored for 12 months at 21°–25° Celsius exposed to light (4).  
10  
11  
12  
13

14  
15 Few other studies were identified which address degradation of uterotonics resulting from  
16  
17 environmental exposure. Those that were identified are not recent, and all focused only  
18  
19 on oral and injectable preparations of oxytocics: ergometrine, methylergometrine, and  
20  
21 oxytocin. Exact estimates of the shelf life of oxytocin and ergometrine varied across the  
22  
23 studies, but in general the results of these studies concurred with the conclusion of the  
24  
25 WHO simulation study that ergometrine was much less stable under tropical conditions  
26  
27 than oxytocin, but that both posed public health concerns in contexts without access to  
28  
29 refrigeration (5-8). No studies were identified which addressed the potency of  
30  
31 misoprostol or the existence of counterfeit or substandard (i.e., drugs which at  
32  
33 manufacture do not meet the specifications reported by the manufacturer) uterotonics.  
34  
35  
36  
37  
38  
39

40  
41 In Ghana, there are approximately 1,600 retail pharmacies and 10,000 chemical sellers, of  
42  
43 which 7,000 are registered with the Pharmacy Council, the regulatory body of the  
44  
45 Ministry of Health tasked with ensuring the quality, accessibility, and equitable  
46  
47 distribution of pharmaceutical services, and the Association of Chemical Sellers (9). In  
48  
49 Ghana, only those pharmacies with a License A are legally authorized to sell uteronic  
50  
51 drugs.  
52  
53  
54  
55  
56  
57  
58  
59  
60



1  
2  
3 The objectives of this study were (1) to assess access of the population to uterotonic  
4 with and without prescription and (2) to assess potency of injectable oxytocin and  
5  
6 ergometrine from varying sources from three contrasting districts in Ghana.  
7  
8  
9

## 10 11 12 **Methods**

13  
14 The study design involved research assistants simulating clients to purchase ampoules of  
15  
16 oxytocin and ergometrine from different types of points of sale. In an effort to design a  
17  
18 representative sample of uterotonic points of sale, one district was selected from each of  
19  
20 the three ecological regions of the country (coastal, forest, and savannah), which also  
21  
22 differ on major socio-economic indicators.  
23  
24  
25  
26  
27  
28

29 In August 2010 a research assistant traveled throughout the selected districts to compile a  
30  
31 list including all pharmacies and chemical shops. In addition, he was asked to compile  
32  
33 information on informal points of sale such as markets from which drugs might be  
34  
35 purchased from stationed sellers and mobile drug peddlers. All efforts were made to  
36  
37 compile an exhaustive list, acknowledging that this is nearly impossible given the  
38  
39 informal and transient nature of some points of sale. Upon the research assistant's return  
40  
41 to Accra, pharmacies and chemical shops in each district were consecutively numbered, a  
42  
43 random start number was selected, and points of sale were systematically selected with a  
44  
45 constant sampling interval until a sample of 25 points of sale were identified in each  
46  
47 district. In Yendi and Kintampo North, all of the chemical shops and pharmacies  
48  
49 identified during the listing exercise were selected for a visit.  
50  
51  
52  
53  
54  
55  
56  
57  
58  
59  
60

1  
2  
3 Two months later a team of nine research assistants simulated clients by visiting each  
4  
5 selected point of sale and requested drugs used by pregnant women to hasten their  
6  
7 delivery, adding that the drugs were needed for his/her sister, who was soon due to  
8  
9 deliver.  
10  
11

12  
13  
14  
15 There was no verbal or written informed consent for this study, as consent of the  
16  
17 salesperson would have undermined the simulation. If the salesperson requested a  
18  
19 prescription, the client provided a prescription for oxytocin and ergometrine, which was  
20  
21 obtained from a Ghana Health Service collaborator in Accra. This was done for two  
22  
23 reasons: (1) for human subjects purposes to avoid putting the salesperson in the position  
24  
25 of being asked to sell drugs to a client without a prescription even after the salesperson  
26  
27 had asked for one, and (2) to ensure a sufficient sample of ampoules for chemical assay  
28  
29 later. If the salesperson recommended that the client go elsewhere, the research assistants  
30  
31 substituted the recommended location for the selected site.  
32  
33  
34  
35  
36  
37  
38

39 Purchased ampoules were placed in plastic bags with coded information regarding the  
40  
41 date of purchase, expiry date of the ampoule, type of point of sale, and district name.  
42

43 These bags were placed in vaccine cold chain carriers just after purchase and were placed  
44  
45 in the cold room or refrigerator of the district hospital as quickly as possible and not later  
46  
47 than the evening of the day of purchase. Ampoules remained under refrigeration in the  
48  
49 district hospitals for 0 to 13 days before being transported in the cold chain to Accra. In  
50  
51 Accra, samples were refrigerated for up to one week, after which all samples were  
52  
53 submitted to the Ghana Food and Drugs Board. The Food and Drugs Board documented  
54  
55  
56

1  
2  
3 that all ampoules were delivered under cold chain conditions. Samples were refrigerated  
4  
5 until analysis.  
6  
7  
8  
9

10 Samples were analyzed according to the Finished Pharmaceutical Product specifications  
11 of the British Pharmacopoeia, 2010 edition, as all the samples had the British  
12 Pharmacopoeia as their specification. The United States Pharmacopeia chemical  
13 reference standards for ergonovine maleate (ergometrine maleate) RS and oxytocin RS  
14 were used as standard comparators in the analysis: for oxytocin, 46 oxytocin units per  
15 vial, USP Reference Standard, Lot F1G134, Cat. No. 1491300; and for ergonovine  
16 maleate, 100 mg, USP Reference Standard, Cat. No. 24000. The ampoules were tested  
17 without blinding to product packaging, as information on the packaging is required for  
18 testing. However, the manufacturer name was not included among assay results, as  
19 required for ethical approval of the study.  
20  
21  
22  
23  
24  
25  
26  
27  
28  
29  
30  
31  
32  
33  
34  
35  
36  
37

38 This study was approved by institutional review boards at the Ghana Health Service in  
39 Accra, Ghana; PATH in Seattle, Washington; and the Johns Hopkins Bloomberg School  
40 of Public Health in Baltimore, Maryland. All authors have completed the Unified  
41 Competing Interest form at [www.icmje.org/coi\\_disclosure.pdf](http://www.icmje.org/coi_disclosure.pdf) (available on request from  
42 the corresponding author) and declare that (1) CS, AK and EM have contract support  
43 from PATH for the submitted work and that PC, BG and SB have grant support from the  
44 Bill and Melinda Gates Foundation for the submitted work; no financial relationships  
45 with any organisations that might have an interest in the submitted work in the previous  
46  
47  
48  
49  
50  
51  
52  
53  
54  
55  
56  
57  
58  
59  
60

1  
2  
3 three years; no other relationships or activities that could appear to have influenced the  
4 submitted work; (2) CS, AK, PC, EM, BG and SB have no relationships with any  
5 companies that might have an interest in the submitted work in the previous three years;  
6  
7  
8 (3) their spouses, partners or children have no financial relationships that may be relevant  
9 to the submitted work; and (4) CS, AK, PC, EM, BG and SB have no non-financial  
10 interests that may be relevant to the submitted work. This research was supported by the  
11 Oxytocin Initiative project at PATH with funding from the Bill & Melinda Gates  
12 Foundation. The funders of the study had no role in the design, conduct, analysis,  
13 interpretation of study results, writing of this manuscript or the decision to submit the  
14 manuscript for publication. The authors had access to and full control of all primary data.  
15  
16  
17 The study was undertaken by PATH, the Johns Hopkins Bloomberg School of Public  
18 Health and the Regional Institute for Population Studies at the University of Ghana.  
19  
20  
21  
22  
23  
24  
25  
26  
27  
28  
29  
30  
31  
32  
33  
34  
35  
36  
37

## 38 **Results**

39 Descriptive statistics for the study districts are provided in Table 1. Yendi District is  
40 located in the Northern Region and is socio-economically disadvantaged relative to the  
41 other two districts. Socio-economic indicators for Kintampo North in Brong-Ahafo  
42 Region fall between those of the Northern and Western Regions in which Ahanta West  
43 District is located (9).  
44  
45  
46  
47  
48  
49  
50

51  
52  
53  
54 INSERT TABLE 1 HERE  
55

1  
2  
3  
4  
5  
6 Sixty-nine visits to formal points of sale and 21 visits to informal points of sale were  
7  
8 made in total. Formal points of sale included private pharmacies, chemical shops, and  
9  
10 public health facility pharmacies. Informal points of sale included market places, mobile  
11  
12 peddlers, and herbal or home clinics. Although the original plan was to restrict sampling  
13  
14 to private points of sale, salespeople occasionally either declined to sell uterotonic drugs  
15  
16 or did not have any to sell, and recommended that the client go to the nearby public  
17  
18 health facility pharmacy. Thus, as described in Table 2, 10% of the 69 commercial points  
19  
20 of sale visited were public health facility pharmacies. Eighty-three percent of visits to  
21  
22 formal points of sale were to chemical shops, with only 7% to private pharmacies. In  
23  
24 Kintampo North and Yendi districts, all chemical shops identified during the August  
25  
26 listing exercise were visited except for two—one due to inaccessible roads and one which  
27  
28 was closed for the duration of fieldwork. In Ahanta West, research assistants went to  
29  
30 pharmacies across district lines at the recommendation of a salesperson. Half of the  
31  
32 informal points of sale were mobile peddlers (11 of 21), followed by market places (8 of  
33  
34 21). The list of informal points of sale which were visited, however, was opportunistic.  
35  
36  
37  
38  
39  
40  
41  
42

43 INSERT TABLE 2 HERE  
44  
45  
46  
47

48 A total of 101 ampoules were collected via the simulated client exercise: 46 ampoules of  
49  
50 oxytocin 10 IU and 55 ampoules of ergometrine 0.5 mg. Tables 3 and 4 present the  
51  
52 percent distribution of purchased ampoules of oxytocin and ergometrine by district and  
53  
54 by type of point of sale, respectively. Only 15% of the ampoules purchased were from  
55  
56  
57  
58  
59  
60

1  
2  
3 Yendi district, with approximately 42% each purchased by the teams in Ahanta West and  
4  
5 Kintampo North. To note, there are no pharmacies in Ahanta West District, the four  
6  
7 pharmacies visited by the simulated clients from Ahanta West were in a neighboring  
8  
9 district to which they were referred. Approximately one third of the 101 ampoules were  
10  
11 purchased from chemical sellers, who in theory are not licensed to sell uterotonic drugs.  
12  
13 More than one in five ampoules (22%) were purchased in public health facility  
14  
15 pharmacies. In most cases, the simulated clients purchased one ampoule each of  
16  
17 ergometrine and oxytocin. At four points of sale, simulated clients were sold five  
18  
19 ampoules of both drugs and at one site they were sold ten ergometrine ampoules.  
20  
21  
22  
23  
24  
25  
26

27 Products other than injectable uterotonics were offered to and purchased by the simulated  
28  
29 clients, including ergometrine tablets, misoprostol, Buscopan, Ladymax, and Menstrogen.  
30  
31 None of these products were tested for active ingredients. No uterotonics were  
32  
33 successfully purchased from mobile peddlers, herbal/home clinics, or markets. A variety  
34  
35 of black or red powders or dark-colored roots were purchased from mobile peddlers in  
36  
37 response to the simulated client's request for a product that would hasten labor.  
38  
39  
40  
41 Traditional preparations were not tested for uterotonic properties.  
42  
43  
44  
45

46 INSERT TABLES 3 and 4 HERE  
47  
48  
49  
50

51 Table 5 presents the distribution of the percentage of active ingredient in the purchased  
52  
53 ampoules of oxytocin and ergometrine. Among the 46 oxytocin ampoules, 26% (11  
54  
55 ampoules) met British Pharmacopoeia specifications, showing 90%–110% active  
56  
57  
58  
59  
60

1  
2  
3 ingredient. Only 4% (2 ampoules) of oxytocin ampoules had expired. None of the 55  
4  
5 ergometrine ampoules met the British Pharmacopoeia specification with a level of active  
6  
7 ingredient between 90% and 110%. Seventy-six percent of the ergometrine ampoules  
8  
9 showed less than 60% active ingredient. One ergometrine ampoule showed 0% active  
10  
11 ingredient and one showed 120% active ingredient. None of the ergometrine ampoules  
12  
13 had expired. The median percentages of active ingredients were 64% and 50% percent for  
14  
15 oxytocin and ergometrine, respectively.  
16  
17  
18  
19  
20  
21

22 INSERT TABLE 5 HERE  
23  
24  
25  
26

27 Figures 1 and 2 illustrate the number of ampoules of oxytocin and ergometrine by in-  
28  
29 country registration status of the product and by type of point of sale. None of the  
30  
31 oxytocin ampoules purchased were from a registered manufacturer of oxytocin. Eighteen  
32  
33 of the oxytocin samples (39%) were from manufacturers whose registration status was  
34  
35 pending, and 28 (61%) were from unregistered manufacturers of oxytocin. Unregistered  
36  
37 oxytocin was purchased from chemical shops, private pharmacies, and public health  
38  
39 facility pharmacies. All of the oxytocin ampoules from unregistered manufacturers were  
40  
41 outside specification for active ingredient. One third of the oxytocin ampoules from  
42  
43 manufacturers with pending registration status were outside specification for active  
44  
45 ingredient (data not shown).  
46  
47  
48  
49  
50  
51  
52

53 For ergometrine, 17 ampoules (31%) were from registered manufacturers of ergometrine,  
54  
55 11 (20%) were from manufacturers whose registration status was pending, and 27 (49%)  
56  
57  
58  
59  
60

1  
2  
3 were from unregistered manufacturers of ergometrine (including the ampoule with 0%  
4 active ingredient). As with oxytocin, unregistered ergometrine was purchased from all  
5 types of points of sale. All ergometrine ampoules were outside specification for active  
6 ingredient.  
7  
8  
9  
10  
11  
12  
13

14  
15 INSERT FIGURES 1 and 2 HERE  
16  
17  
18  
19

20 It was not possible to quantify results regarding the need for a prescription to purchase  
21 uterotonics. In some cases, salespeople made vague mention of the need for a  
22 prescription, but never actually requested one, or they asked for a prescription but never  
23 looked at it. Where prescriptions were requested, all were given back to the simulated  
24 client. In some cases where clients were referred to a public health facility pharmacy, the  
25 simulation ceased and a health care provider accompanied the research assistant to the  
26 facility pharmacy. In short, it appears that it was common but not universal that the  
27 salesperson requested a prescription. The research assistants also noted that salespeople  
28 often assumed they were interested in uterotonic drugs for abortion purposes, despite  
29 their story about a woman who was soon to deliver.  
30  
31  
32  
33  
34  
35  
36  
37  
38  
39  
40  
41  
42  
43  
44  
45

## 46 Discussion

47  
48 Four messages resound from the analysis of this exploratory study: (1) quality of  
49 uterotonics is likely a serious problem, at least in these districts in Ghana; 89% of all  
50 ampoules tested in this study did not meet the specifications for active ingredient; (2) the  
51 low level of active ingredient in these ampoules is not due to old drugs; only 2% of these  
52  
53  
54  
55  
56  
57  
58  
59  
60



1  
2  
3 ampoules had expired; (3) there is little enforcement of the restriction against chemical  
4 shops selling uterotonics or of the sale of unregistered uterotonics in these districts; and  
5  
6  
7  
8 (4) inactive uterotonics are not restricted to the private sector; uterotonics outside  
9  
10 specification were purchased from private and public sources. It is also clear that public  
11 and private sources procure unregistered uterotonics. It was not possible to quantify  
12  
13 results on the need for a prescription to purchase uterotonics, though in many cases the  
14  
15 client was at least vaguely asked for a prescription.  
16  
17  
18  
19  
20  
21

22 There are a number of strengths and limitations to this study. Strengths include the fact  
23 that an up-to-date listing of points of sale was compiled specifically for this study; a  
24 sample of randomly selected sites was visited; and in two of three districts the selected  
25  
26 points of sale represented all the existing, accessible chemical sellers and pharmacies.  
27  
28 The simulated client approach would also have prevented possible bias in the selection of  
29  
30 ampoules for testing. Limitations include the fact that the sampling frame may not have  
31  
32 been 100% exhaustive, given the informal nature of some drug sellers, and that the  
33  
34 number of points of sale selected for visit (25 per district) was based on practical  
35  
36 considerations and resulted in a relatively small sample of ampoules available for  
37  
38 chemical testing. Study results were strikingly similar across three diverse districts,  
39  
40 however, and this is unlikely to result from sampling error. Some misclassification  
41  
42 between chemical sellers and pharmacies was also possible, as shops were classified  
43  
44 based on their exterior signage. As simulated clients, the research assistants could not ask  
45  
46 questions regarding a shop's licenses or the qualifications of the sales-person.  
47  
48  
49  
50  
51  
52  
53  
54  
55  
56  
57  
58  
59  
60

1  
2  
3 Study results were shared with the Ghana Food and Drugs Board and other interested  
4  
5 parties and clearly warrant in-depth investigation by both the Food and Drugs Board and  
6  
7 the Ghana Health Service. The difficulties of the Ghana Food and Drugs Board in  
8  
9 monitoring and addressing counterfeit and substandard drugs have been highlighted in a  
10  
11 recent private health sector assessment by the World Bank (11). A 2010 evaluation of the  
12  
13 efforts of the Medicines Transparency Alliance (META) in Ghana includes among its ten  
14  
15 recommendations that each META Governing Council meeting should include discussion  
16  
17 of a specific substantive drug-related issue and that these discussions should be informed  
18  
19 by a fact sheet of existing information developed specifically for this purpose (9). The  
20  
21 results of this study clearly warrant development of a fact sheet on uterotonic drug quality  
22  
23 by the META Governing Council, as well as consideration of including one or more  
24  
25 uterotonic drugs on the list of tracer drugs in Ghana. The common and accepted practice  
26  
27 by public health facilities of purchasing additional drugs on the private market when  
28  
29 centrally distributed stocks are low requires closer monitoring by the Ghana Health  
30  
31 Service to prevent the purchase of unregistered drugs.  
32  
33  
34  
35  
36  
37  
38  
39  
40

41 This study also raises a host of questions which are not specific to Ghana. For example,  
42  
43 given the need for additional data on uterotonic drug quality in poor countries, which  
44  
45 approaches to data collection and sampling should be promoted and for which objectives?  
46  
47 Simulated clients were used in this study to ensure an unbiased selection of ampoules for  
48  
49 chemical testing and to assess how well pharmacies follow existing regulations requiring  
50  
51 a prescription for the sale of uterotonic drugs. An important consequence of using  
52  
53 simulated clients, however, is that it precludes data collection on why ampoules were out  
54  
55  
56  
57  
58  
59  
60

1  
2  
3 of specification for active ingredients. In the absence of information on drug quality at  
4  
5 manufacture and packaging, and storage conditions along the distribution chain, it is not  
6  
7 possible to determine whether the cause is counterfeit, substandard, or degraded drugs.  
8  
9 Although it is likely that at least one reason for the low percentages of active ingredients  
10  
11 is unrefrigerated storage (for both oxytocin and ergometrine) and/or exposure to light (for  
12  
13 ergometrine), one does not know at which points along the distribution chain this may  
14  
15 have occurred. These limitations should be seriously considered when deciding on study  
16  
17 design. Finally, the study also raises the question of which uterotonic drugs should be  
18  
19 tested. In this study, it was considered unnecessary to test misoprostol. However, given  
20  
21 the rapid expansion of the availability of and demand for misoprostol, particularly in  
22  
23 South and Southeast Asia (12), counterfeit misoprostol is likely to become a problem and  
24  
25 should be considered for inclusion in future studies.  
26  
27  
28  
29  
30  
31  
32  
33

34 The results of this study are sufficient to raise serious concerns regarding the quality of  
35  
36 oxytocin and ergometrine, particularly at the peripheral level in Ghana, and potentially in  
37  
38 other low-income countries. While efforts to reduce maternal mortality have focused on  
39  
40 training health workers to prevent and treat postpartum haemorrhage, these efforts and  
41  
42 resources are undermined if health workers do not have access to high-quality uterotonics.  
43  
44 These results suggest that any focused postpartum haemorrhage reduction strategy also  
45  
46 requires ongoing surveillance of uterotonic drugs, enforcement of drug registration and  
47  
48 pharmaceutical licensing regulations, and increased attention to drug storage and  
49  
50 procurement. Post-marketing surveillance of drug quality in low income countries is  
51  
52 often restricted to disease-specific, well-financed health programs such as those that rely  
53  
54  
55  
56  
57  
58  
59  
60

1  
2  
3  
4  
5  
6  
7  
8  
9  
10  
11  
12  
13  
14  
15  
16  
17  
18  
19  
20  
21  
22  
23  
24  
25  
26  
27  
28  
29  
30  
31  
32  
33  
34  
35  
36  
37  
38  
39  
40  
41  
42  
43  
44  
45  
46  
47  
48  
49  
50  
51  
52  
53  
54  
55  
56  
57  
58  
59  
60

on anti-retrovirals, antibiotics and anti-malarial drugs. Maternal health programs must adopt and fund the same approach to drug quality as is standard in programs addressing infectious disease.

For peer review only

## References

1. WHO. WHO Model List of Essential Medicines; 16th list (updated). Geneva; 2010 [updated 2010; cited]; Available from:  
<http://www.who.int/medicines/publications/essentialmedicines/en/index.html>.
2. WHO. WHO Statement regarding the use of misoprostol for Postpartum Haemorrhage prevention and treatment. Geneva: Department of Reproductive Health and Research. 2009.
3. Stability of injectable oxytocics in tropical climates; Results of field surveys and simulation studies on ergometrine, methylergometrine and oxytocin [database on the Internet]. Action Program on Essential Drugs; World Health Organisation, Geneva. 1993
4. WHO. WHO List of Priority Medicines for Mothers and Children. Department of Maternal, Newborn, Child and Adolescent Health. 2011.
5. de Groot AN, Hekster YA, Vree TB, et al. Ergometrine and methylergometrine tablets are not stable under simulated tropical conditions. *J Clin Pharm Ther*. 1995 Apr;20(2):109-13.
6. de Groot AN, Hekster YA, Vree TB, et al. Oxytocin and desamino-oxytocin tablets are not stable under simulated tropical conditions. *J Clin Pharm Ther*. 1995 Apr;20(2):115-9.
7. Hogerzeil HV, Battersby A, Srdanovic V, et al. Stability of essential drugs during shipment to the tropics. *BMJ*. 1992 Jan 25;304(6821):210-2.
8. Nazerali H, Hogerzeil HV. The quality and stability of essential drugs in rural Zimbabwe: controlled longitudinal study. *BMJ*. 1998 Aug 22;317(7157):512-3.

- 1
- 2
- 3 9. Waddington CM, Coleman, NA. Evaluation of the MeTA Phase 1 2009-2010;
- 4
- 5 Ghana Country Report. London: HLSP; 2010.
- 6
- 7
- 8 10. Ghana Health Service, Ghana Statistical Service, Macro International. Ghana
- 9
- 10 Maternal Health Survey, 2007. Calverton, Maryland USA; 200.
- 11
- 12
- 13 11. Makinen MS, S. Bitran, R. Adjei, et al. Private Health Sector Assessment in
- 14
- 15 Ghana. Washington DC: The World Bank; 2010 Contract No.: Document Numberl.
- 16
- 17
- 18 12. Fernandez MM, Coeytaux F, de Leon RG, et al. Assessing the global availability
- 19
- 20 of misoprostol. Int J Gynaecol Obstet. 2009 May;105(2):180-6.
- 21
- 22
- 23
- 24
- 25
- 26
- 27
- 28
- 29
- 30
- 31
- 32
- 33
- 34
- 35
- 36
- 37
- 38
- 39
- 40
- 41
- 42
- 43
- 44
- 45
- 46
- 47
- 48
- 49
- 50
- 51
- 52
- 53
- 54
- 55
- 56
- 57
- 58
- 59
- 60

Table 1. Regional socio-economic indicators for study districts; data from the Ghana Maternal Health Survey, 2007

| Characteristics                                       | Northern Region (Yendi) (%) | Brong-Ahafo (Kintampo North) (%) | Western Region (Ahanta West) (%) |
|-------------------------------------------------------|-----------------------------|----------------------------------|----------------------------------|
| % of reproductive aged women with no education        | 67.5                        | 27.7                             | 19.0                             |
| % of women using modern contraception                 | 7.3                         | 17.5                             | 19.9                             |
| % of births assisted by a medically trained attendant | 27.3                        | 56.9                             | 53.6                             |

Table 2. Numbers and percent distribution of the points of sale visited by simulated clients by district

|                                     | District |                   |             |       |         |
|-------------------------------------|----------|-------------------|-------------|-------|---------|
|                                     | Yendi    | Kintampo<br>North | Ahanta West | Total | Total % |
| Number of Commercial Points of Sale |          |                   |             |       | %       |
| Private Pharmacies                  | 0        | 1                 | 4*          | 5     | 7.3     |
| Chemical Shops/Sellers              | 23       | 17                | 17          | 57    | 82.6    |
| Public Health Facility Pharmacies   | 6        | 1                 | 0           | 7     | 10.1    |
| Total                               | 29       | 19                | 21          | 69    | 100.0   |
| Number of Informal Points of Sale   |          |                   |             |       | %       |
| Markets                             | 2        | 5                 | 1           | 8     | 38.1    |
| Home/Herbal Clinics                 | 1        | 0                 | 1           | 2     | 9.5     |
| Mobile Peddlers                     | 4        | 3                 | 4           | 11    | 52.4    |
| Total                               | 7        | 8                 | 6           | 21    | 100.0   |

\*All pharmacies were located outside of Ahanta West in a contiguous district.



Table 3. Percent distribution of purchased oxytocin and ergometrine ampoules by district

| District    | Oxytocin (%) | Ergometrine (%) |
|-------------|--------------|-----------------|
| Yendi       | 15.2         | 14.5            |
| Kintampo    | 30.4         | 51.0            |
| Ahanta West | 52.2         | 34.5            |
| Missing     | 2.2          | 0.0             |
| Total % (N) | 100 (46)     | 100.0 (55)      |

Table 4. Percent distribution of purchased oxytocin and ergometrine ampoules by type of point of sale

| Source of purchase                | Oxytocin (%) | Ergometrine (%) |
|-----------------------------------|--------------|-----------------|
| Private Pharmacies                | 32.6         | 58.2            |
| Chemical Shops/Sellers            | 39.1         | 23.6            |
| Public Health Facility Pharmacies | 26.1         | 18.2            |
| Missing                           | 2.2          | 0.0             |
| Total % (N)                       | 100.0 (46)   | 100.0 (55)      |

Table 5. Percent distribution of the assay percentage of active ingredient in purchased ampoules of oxytocin and ergometrine

| Assay percentage | Oxytocin 10 IU (%) | Ergometrine 0.5 mg (%) |
|------------------|--------------------|------------------------|
| 0%               | 0.0                | 1.8                    |
| 1%–39%           | 23.9               | 23.7                   |
| 40%–59%          | 8.7                | 50.8                   |
| 60% –89%         | 41.3               | 21.9                   |
| 90% –110%        | 26.1               | 0.0                    |
| >110%            | 0.0                | 1.8                    |
| Total (N)        | 100.0 (46)         | 100.0 (55)             |
| Median %         | 64.0               | 50.5                   |
| Percent expired  | 4.3 (2)            | 0.0 (0)                |

1  
2  
3  
4  
5  
6  
7  
8  
9  
10  
11  
12  
13  
14  
15  
16  
17  
18  
19  
20  
21  
22  
23  
24  
25  
26  
27  
28  
29  
30  
31  
32  
33  
34  
35  
36  
37  
38  
39  
40  
41  
42  
43  
44  
45  
46  
47  
48  
49  
50  
51  
52  
53  
54  
55  
56  
57  
58  
59  
60

Figure 1. Number of purchased ampoules of oxytocin by in-country registration status of the product and by type of point of sale

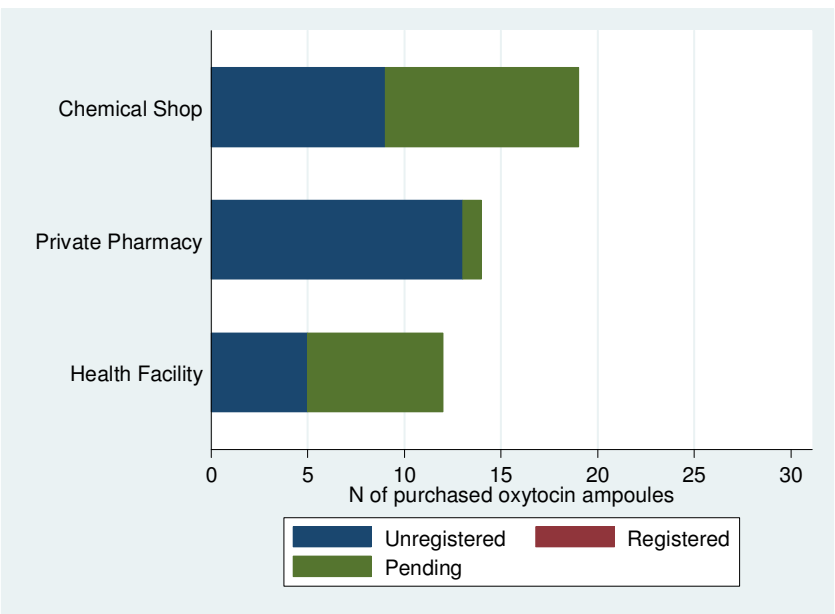

review only

Figure 2. Number of purchased ampoules of ergometrine by in-country registration status of the product and by type of point of sale

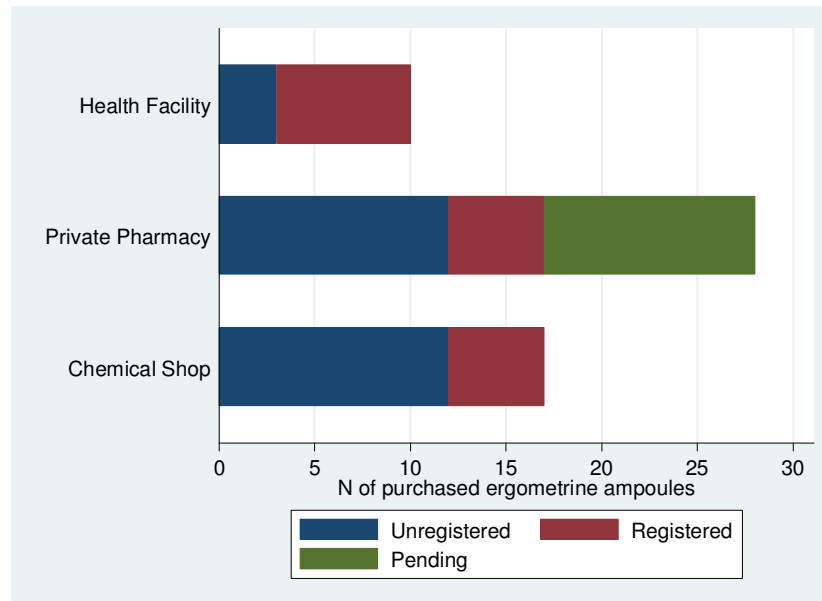

**Contributors:**

The authors wish to acknowledge the contributions of Stephen Kwankye, Delali Badasu, Kamil Fuseini, Henry Tagoe, Adriana Biney, and Nanaa Boakye of the Regional Institute for Population Studies for assisting with data collection. We also recognize John Gyapong (Ghana Health Service) and Gloria Quansah-Asare (Ghana Ministry of Health) for their support throughout the implementation and analysis phases of the study. We acknowledge Deborah Armbruster, formerly of PATH, for her contribution to the initiation and design of the Oxytocin Initiative and Alice Levisay and Sadaf Khan of PATH for their assistance in the editing of this manuscript.

**Author Contributions:**

CS assisted in the design of the study, analyzed the data, and wrote the first draft of the paper. AK, PC, and EM assisted with the design of the study, oversaw data collection, and assisted with editing the paper. BG and SB provided technical guidance throughout the study, particularly regarding potency testing of the uterotonic drugs, and assisted with the editing of the paper.

**Copyright/license for publication:**

The corresponding author has the right to grant on behalf of all authors and does grant on behalf of all authors, an exclusive license on a worldwide basis to the BMJ Publishing Group Ltd and its licensees, to permit this article (if accepted) to be published in BMJ editions and any other MBJPG products and to exploit all subsidiary rights, as set out in

1  
2  
3 our licence ([http://resources.bmj.com/bmj/authors/checklists-forms/licence-for-](http://resources.bmj.com/bmj/authors/checklists-forms/licence-for-publication)  
4  
5 [publication](http://resources.bmj.com/bmj/authors/checklists-forms/licence-for-publication)).  
6  
7  
8  
9

### 10 **Appendix 1:**

11  
12 The design, documentation and reporting of results for this study follows the STROBE  
13  
14 guidelines for the reporting of observational studies.  
15  
16  
17  
18  
19  
20  
21  
22  
23  
24  
25  
26  
27  
28  
29  
30  
31  
32  
33  
34  
35  
36  
37  
38  
39  
40  
41  
42  
43  
44  
45  
46  
47  
48  
49  
50  
51  
52  
53  
54  
55  
56  
57  
58  
59  
60

January 4, 2012

**STROBE CHECKLIST:** For manuscript # BMJ.2011.001082**Title:** Uterotonic Drug Quality: An Assessment of the Potency of Injectable Uterotonic Drugs Purchased by Simulated Clients in Three Districts in Ghana

| Item                         | Item # | Recommendation                                                                                                                                   | Description of Manuscript Content                                                                                                                                                                                                                                                                                     |
|------------------------------|--------|--------------------------------------------------------------------------------------------------------------------------------------------------|-----------------------------------------------------------------------------------------------------------------------------------------------------------------------------------------------------------------------------------------------------------------------------------------------------------------------|
| <b>Title and Abstract</b>    | 1      | Study design indicated with commonly used terms in title or abstract;<br>Provide in abstract informative/balanced summary of methods and results | Our title describes study design: Uterotonic Drug Quality: An Assessment of the Potency of Injectable Uterotonic Drugs Purchased by Simulated Clients in Three Districts in Ghana;<br>Study Method is described in non-technical language. Basic results are provided regarding the potency of the two drugs studied. |
| <b>Introduction</b>          |        |                                                                                                                                                  |                                                                                                                                                                                                                                                                                                                       |
| Background/<br>rationale     | 2      | Explain the scientific background and the rationale for the study                                                                                | The introduction summarizes the use of uterotonic drugs in poor countries, the current programmatic priority for postpartum hemorrhage prevention and previous studies of uterotonic quality. Pages 5-6                                                                                                               |
| Objectives                   | 3      | State objectives and pre-specified hypotheses                                                                                                    | 2 objectives are clearly specified. There were no pre-specified hypotheses re: results. See 1 <sup>st</sup> paragraph of page 7                                                                                                                                                                                       |
| <b>Methods</b>               |        |                                                                                                                                                  |                                                                                                                                                                                                                                                                                                                       |
| Study design                 | 4      | Present key elements of study design                                                                                                             | Detailed steps of the study design are presented in chronological order. See pages 7 – 1 <sup>st</sup> 2 paragraphs of page 9.                                                                                                                                                                                        |
| Setting                      | 5      | Describe setting, relevant dates, recruitment, follow up and data collection                                                                     | On pages 7 and 8, the dates of the sampling frame compilation and data collection are provided. Data collection procedures, drug handling procedures and details regarding the chemical assays are provided on pages 7-9;                                                                                             |
| Participants                 | 6      | Cross-sectional study: provide eligibility criteria and sources and methods for the selection of participants                                    | In this study, sample selection of facilities replaces eligibility criteria for study participants. As described on page 7, in 2 of 3 districts, all pharmacies identified in the sampling frame were eventually selected to participate in the study.                                                                |
| Variables                    | 7      | Clearly define all outcomes, predictors, etc.                                                                                                    | The main outcome is the percent of active ingredient in the drug assayed, and it is compared against manufacturer specification (described on pages 12-13). Other variables are simple descriptors: region, pharmacy type and registration status – which are all self-explanatory.                                   |
| Data sources/<br>measurement | 8      | Provide sources of data and                                                                                                                      | The chemical assays are described in detail. See page 9.                                                                                                                                                                                                                                                              |



| Item                   | Item # | Recommendation                                                                                                          | Description of Manuscript Content                                                                                                                                                                                                                                                                                                                                                                                                                                                                          |
|------------------------|--------|-------------------------------------------------------------------------------------------------------------------------|------------------------------------------------------------------------------------------------------------------------------------------------------------------------------------------------------------------------------------------------------------------------------------------------------------------------------------------------------------------------------------------------------------------------------------------------------------------------------------------------------------|
|                        |        | measurement methods                                                                                                     |                                                                                                                                                                                                                                                                                                                                                                                                                                                                                                            |
| Bias                   | 9      | Describe efforts to assess sources of bias                                                                              | The simulated client method prevents bias in the selection of ampoules chosen for chemical assay since the pharmacists/drug seller does not know that the drugs will be tested (2 <sup>nd</sup> paragraph, page 15). The authors discuss possible bias due to a sampling frame that may not have been 100% complete due to the informal nature of some points of drug sale. However, they note that the results are so overwhelmingly similar that they are unlikely to have resulted from sampling error. |
| Study size             | 10     | Explain how study size was arrived at                                                                                   | The Methods section describes the plan of selecting 25 points of sale in each district. In the Discussion, this sampling plan, which was based on practical and budgetary considerations and resulted in a relatively small sample size is cited as a limitation of the study. However, the overall sample (101 ampoules) in this study does not compare unfavorably to existing community-based studies identified in the literature.                                                                     |
| Quantitative variables | 11     | Explain how quantitative variables were handled, grouped and the rationale for grouping                                 | The key outcome variable (% active ingredient) was compared against the manufacturer's specifications (90%-110%). Additional groupings (0%, 1-39, 40-59, 60-89%) were selected simply to show the distribution. 0% was shown to identify possible cases of counterfeit drug.                                                                                                                                                                                                                               |
| Statistical methods    | 12     | Describe all statistical methods                                                                                        | As stated in the Methods section, only simple descriptive statistics are used in this paper (% distributions, means). There was no reason to assess confounders in this observational study based on our objectives. Missing data are shown in the tables.                                                                                                                                                                                                                                                 |
| <b>Results</b>         |        |                                                                                                                         |                                                                                                                                                                                                                                                                                                                                                                                                                                                                                                            |
| Participants           | 13     | Report n of participants at each stage of the study; Give reasons for non-participation, Consider use of a flow diagram | As described in #6 above, the selection of points of sale replaces recruitment of study participants in this study. Our sampling procedure is described under Methods and the results of our sampling procedure is described under Results (see page 11).                                                                                                                                                                                                                                                  |
| Descriptive data       | 14     | Give characteristics of study participants, indicate participants with missing data                                     | In this case, points of sale are the equivalent of study participants, and within points of sale, ampoules were selected for assay. Points of sale are described by region (no missing data) and type (data were missing on type of point of sale for 1 ampoule – this is noted in Tables 3 and 4.)                                                                                                                                                                                                        |

| Item                     | Item # | Recommendation                                                                                                          | Description of Manuscript Content                                                                                                                                                                                                                                                                                                                                     |
|--------------------------|--------|-------------------------------------------------------------------------------------------------------------------------|-----------------------------------------------------------------------------------------------------------------------------------------------------------------------------------------------------------------------------------------------------------------------------------------------------------------------------------------------------------------------|
| Outcome data             | 15     | Cross-sectional study: Report numbers of outcomes events or summary measures                                            | N's and percentages and means are presented for potency; that is, outcome data on the % of active ingredient in each ampoule.                                                                                                                                                                                                                                         |
| Main results             | 16     | Report n of participants at each stage of the study; Give reasons for non-participation; Consider use of a flow diagram | As described in #6 above, the selection of points of sale replaces recruitment of study participants in this study. Our sampling procedure is described under Methods and the results of our sampling procedure are described under Results (see page 11). The n's for all ampoules tested are shown in Tables 4 and 5.                                               |
| Other analyses           | 17     | Report on other analyses conducted (sub-group, etc)                                                                     | No additional analyses were conducted.                                                                                                                                                                                                                                                                                                                                |
| <b>Discussion</b>        |        |                                                                                                                         |                                                                                                                                                                                                                                                                                                                                                                       |
| Key results              | 18     | Summarize key results with reference to study objectives                                                                | The key results are summarized in four concise statements in the first paragraph of the Discussion section.                                                                                                                                                                                                                                                           |
| Limitations              | 19     | Discuss limitations of the study, including possible biases, imprecision and direction and magnitude of such            | Possible biases are discussed in the 1 <sup>st</sup> paragraph of page 15 (including the low likelihood that an incomplete sampling frame could have qualitatively changed the key results). The fact that it was not possible to address one of our objectives (ie, quantify results for the need for a prescription for uterotonic drugs) is also discussed openly. |
| Interpretation           | 20     | Give a cautious overall interpretation considering objectives, results form similar studies and other relevant evidence | The results are presented as: uterotonic drug quality is likely a serious problem in these three districts. There is no other comparable evidence from Ghana against which one can compare these results. However, reports referring to other types of low quality drugs in Ghana are cited.                                                                          |
| Generalizability         | 21     | Discuss generalizability of study results                                                                               | Authors were cautious in over-interpreting generalizability of results regarding drug quality in this paper. However, the authors do draw attention to issues discussed in this paper regarding drug quality study design which are generalizable to other poor countries.                                                                                            |
| <b>Other information</b> |        |                                                                                                                         |                                                                                                                                                                                                                                                                                                                                                                       |
| unding                   | 22     | Provide source of funding and role of funders                                                                           | A statement regarding the funding of the study and the role of the funders is included on page 10, in the paragraph preceding Results.                                                                                                                                                                                                                                |

1  
2  
3  
4  
5  
6  
7  
8  
9  
10  
11  
12  
13  
14  
15  
16  
17  
18  
19  
20  
21  
22  
23  
24  
25  
26  
27  
28  
29  
30  
31  
32  
33  
34  
35  
36  
37  
38  
39  
40  
41  
42  
43  
44  
45  
46  
47  
48  
49  
50  
51  
52  
53  
54  
55  
56  
57  
58  
59  
60

For peer review only



**Uterotonic Drug Quality: An Assessment of the Potency of  
Injectable Uterotonic Drugs Purchased by Simulated Clients  
in Three Districts in Ghana**

|                                 |                                                                                                                                                                                                                                                                                                                                                                                                                                                     |
|---------------------------------|-----------------------------------------------------------------------------------------------------------------------------------------------------------------------------------------------------------------------------------------------------------------------------------------------------------------------------------------------------------------------------------------------------------------------------------------------------|
| Journal:                        | <i>BMJ Open</i>                                                                                                                                                                                                                                                                                                                                                                                                                                     |
| Manuscript ID:                  | bmjopen-2011-000431.R1                                                                                                                                                                                                                                                                                                                                                                                                                              |
| Article Type:                   | Research                                                                                                                                                                                                                                                                                                                                                                                                                                            |
| Date Submitted by the Author:   | 30-Mar-2012                                                                                                                                                                                                                                                                                                                                                                                                                                         |
| Complete List of Authors:       | Stanton, Cynthia; Johns Hopkins Bloomberg School of Public Health, Population, Family and Reproductive Health<br>Koski, Alissa; Johns Hopkins Bloomberg School of Public Health, Department of Population, Family and Reproductive Health<br>Cofie, Patience; PATH,<br>Mirzabagi, Ellie; Johns Hopkins Bloomberg School of Public Health, Department of Population, Family and Reproductive Health<br>Grady, Breanne; PATH,<br>Brooke, Steve; PATH, |
| <b>Primary Subject Heading</b>: | Epidemiology                                                                                                                                                                                                                                                                                                                                                                                                                                        |
| Secondary Subject Heading:      | Health services research, Pharmacology and therapeutics, Public health, Reproductive medicine, obstetrics and gynaecology                                                                                                                                                                                                                                                                                                                           |
| Keywords:                       | PUBLIC HEALTH, CLINICAL PHARMACOLOGY, Quality in health care < HEALTH SERVICES ADMINISTRATION & MANAGEMENT, HEALTH SERVICES ADMINISTRATION & MANAGEMENT                                                                                                                                                                                                                                                                                             |
|                                 |                                                                                                                                                                                                                                                                                                                                                                                                                                                     |

SCHOLARONE™  
Manuscripts

1  
2  
3 **Title:** Uterotonic Drug Quality: An Assessment of the Potency of Injectable Uterotonic  
4  
5  
6 Drugs Purchased by Simulated Clients in Three Districts in Ghana

7  
8 **Running head:** Uterotonic Drug Potency in Ghana  
9

10  
11  
12 **Authors:**

13  
14  
15 Cynthia K. Stanton, Associate Professor, Department of Population, Family and  
16  
17 Reproductive Health, The Johns Hopkins Bloomberg School of Public Health, Baltimore,  
18  
19 Maryland, USA

20  
21  
22 Alissa Koski, Research Coordinator, Department of Population, Family and Reproductive  
23  
24 Health, The Johns Hopkins Bloomberg School of Public Health, Baltimore, Maryland,  
25  
26 USA

27  
28  
29 Patience Cofie, PATH, Accra, Ghana

30  
31  
32 Ellie Mirzabagi, Research Coordinator, Department of Population, Family and  
33  
34 Reproductive Health, The Johns Hopkins Bloomberg School of Public Health, Baltimore,  
35  
36 Maryland, USA

37  
38  
39 Breanne Grady, Project Coordinator, PATH, Seattle, Washington, USA

40  
41  
42 Steve Brooke, Commercialization Advisor, PATH, Seattle, Washington

43  
44  
45  
46 **Corresponding Author:** Cynthia K. Stanton; cstanton@jhsph.edu  
47

48  
49  
50 **Word Count:** Abstract 254; Text 3,332

51  
52  
53 N of Tables: 5

54  
55  
56 N of Figures: 2

1  
2  
3 **Key words:** quality medicines, uterotonics, potency, oxytocin, ergometrine  
4  
5  
6  
7  
8  
9  
10  
11  
12  
13  
14  
15  
16  
17  
18  
19  
20  
21  
22  
23  
24  
25  
26  
27  
28  
29  
30  
31  
32  
33  
34  
35  
36  
37  
38  
39  
40  
41  
42  
43  
44  
45  
46  
47  
48  
49  
50  
51  
52  
53  
54  
55  
56  
57  
58  
59  
60

For peer review only

## Summary

### Article focus:

- The need for high quality uterotonic drugs for the prevention and treatment of maternal mortality and morbidity in poor countries is indisputable.
- Best practice for long-term storage for all injectable uterotonics is refrigeration, which is a key logistical constraint for scale-up of postpartum haemorrhage reduction strategies and is a general challenge for maternity services without consistent electricity.
- The objective of the study was to assess the population's access to uterotonic drugs and to assess the chemical potency of ampoules of oxytocin and ergometrine available to the population.

### Key messages:

- Quality of uterotonics is likely a serious problem in Ghana; 89% of all ampoules tested in this study did not meet the specifications for active ingredient. The low level of active ingredient in these ampoules is not due to old drugs; only 2% of these ampoules had expired.
- There is little enforcement of the restriction against chemical shops selling uterotonics or of the sale of unregistered uterotonics in these districts;
- Inactive uterotonics are not restricted to the private sector; uterotonics outside specification were purchased from private and public sources. It is also clear that public and private sources procure unregistered uterotonics.

### Strengths and Limitations

- An up-to-date listing of points of sale was compiled specifically for this study, a sample of randomly selected sites was visited and in two of three districts the selected points of sale represented all the existing, accessible chemical sellers and pharmacies.
- The simulated client approach prevents possible bias in the selection of ampoules to be sent for chemical testing.
- The number of points of sale selected for visit (25 per district) was based on practical considerations and resulted in a relatively small sample of ampoules available for chemical testing.
- The sampling frame may not have been 100% exhaustive, given the informal nature of some drug sellers. However, study results were strikingly similar across three diverse districts, and this is unlikely to result from sampling error.

## ABSTRACT

### Objectives

Given use of uterotonics for postpartum haemorrhage and other obstetric indications, the importance of potent uterotonics is indisputable. This study assessed access to and potency of injectable uterotonics in Ghana.

### Design

Study design involved research assistants simulating clients to purchase oxytocin and ergometrine from different sources. Drug potency was measured via chemical assay by the Ghana Food and Drugs Board.

### Setting

The study was conducted in three contrasting districts in Ghana.

### Outcome measure:

The percent of active pharmaceutical ingredient was measured to assess the quality of oxytocin and ergometrine.

### Results

Sixty-nine formal points of sale were visited, from which 55 ergometrine ampoules and 46 oxytocin ampoules were purchased. None of the ergometrine ampoules were within British Pharmacopoeia specification for active ingredient, none were expired, and one showed 0% active ingredient, suggestive of a counterfeit drug. Among oxytocin ampoules purchased, only 11 (26%) were within British Pharmacopoeia specification for active ingredient and two (4%) were expired. The median percentages of active ingredients were 64% and 50% for oxytocin and ergometrine, respectively.

### Conclusions



1  
2  
3 The quality of injectable uterotonics in three contrasting districts in Ghana is a serious  
4 problem. Restrictions regarding the sale of unregistered drugs, and of registered drugs  
5 from unlicensed shops, are inadequately enforced. These problems likely exist elsewhere,  
6 but are not assessed as post-marketing drug quality surveillance is generally restricted to  
7 well-funded, disease specific programs relying on anti-retroviral, anti-malarial and  
8 antibiotic drugs. Maternal health programs must adopt and fund the same approach to  
9 drug quality as is standard in programs addressing infectious disease.  
10  
11  
12  
13  
14  
15  
16  
17  
18  
19  
20  
21  
22  
23  
24  
25  
26  
27  
28  
29  
30  
31  
32  
33  
34  
35  
36  
37  
38  
39  
40  
41  
42  
43  
44  
45  
46  
47  
48  
49  
50  
51  
52  
53  
54  
55  
56  
57  
58  
59  
60

## Introduction

The most commonly used uterotonic drugs in poor countries are injectable oxytocin, injectable ergometrine and misoprostol tablets. Injectable methylergometrine, injectable syntometrine, and ergometrine tablets are also used. Oxytocin, ergometrine, and misoprostol are included in the World Health Organisation's (WHO) Model List of Essential Medicines (1). Based on existing data, WHO considers oxytocin the drug of choice for postpartum haemorrhage prevention and treatment where a skilled care giver is available, safe injection practices are ensured and refrigeration is feasible (2). Oxytocin is also included in the new WHO list of priority medicines for mothers and children for prevention of postpartum haemorrhage (3). As uterotonics are also used for other obstetric indications (induction, augmentation of labor), the importance of access to potent uterotonics throughout the antepartum and early postpartum periods is indisputable.

Given that postpartum haemorrhage is a leading direct cause of maternal death in many poor countries, large-scale efforts have focused on in-service clinical training for postpartum haemorrhage prevention and treatment which requires uterotonic drugs. However, best practice for long-term storage for all injectable uterotonics is refrigeration, which is a key logistical constraint for scale-up of postpartum haemorrhage reduction strategies and is a general challenge for maternity services without consistent electricity.

In 1993, a WHO simulation study testing the stability of injectable uterotonic drugs showed that oxytocin lost no active ingredient after 12 months under refrigeration (4°–8° Celsius), lost 3%–7% active ingredient after 12 months at 21°–25° Celsius, lost 9%–19%

1  
2  
3 active ingredient after 12 months at 30° Celsius, and was unaffected by exposure to light.  
4  
5 Ergometrine was shown to be much less stable, losing 5% of its active ingredient after 12  
6  
7 months at 4°–8° Celsius when stored in the dark, losing more than 90% of its active  
8  
9 ingredient when stored for 12 months at 21°–25° Celsius exposed to light (4).  
10  
11  
12  
13

14  
15 Few other studies were identified which address degradation of uterotonics resulting from  
16  
17 environmental exposure. Those that were identified are not recent, and all focused only  
18  
19 on oral and injectable preparations of oxytocics: ergometrine, methylethergometrine, and  
20  
21 oxytocin. Exact estimates of the shelf life of oxytocin and ergometrine varied across the  
22  
23 studies, but in general the results of these studies concurred with the conclusion of the  
24  
25 WHO simulation study that ergometrine was much less stable under tropical conditions  
26  
27 than oxytocin, but that both posed public health concerns in contexts without access to  
28  
29 refrigeration (5-8). No studies were identified which addressed the potency of  
30  
31 misoprostol or the existence of counterfeit or substandard (i.e., drugs which at  
32  
33 manufacture do not meet the specifications reported by the manufacturer) uterotonics.  
34  
35  
36  
37  
38  
39

40  
41 In Ghana, there are approximately 1,600 retail pharmacies and 10,000 chemical sellers, of  
42  
43 which 7,000 are registered with the Pharmacy Council, the regulatory body of the  
44  
45 Ministry of Health tasked with ensuring the quality, accessibility, and equitable  
46  
47 distribution of pharmaceutical services, and the Association of Chemical Sellers (9). In  
48  
49 Ghana, only those pharmacies with a License A are legally authorized to sell uterotonic  
50  
51 drugs.  
52  
53  
54  
55  
56  
57  
58  
59  
60

1  
2  
3 The objectives of this study were (1) to assess access of the population to uterotonic  
4 with and without prescription and (2) to assess potency of injectable oxytocin and  
5 ergometrine from varying sources from three contrasting districts in Ghana.  
6  
7  
8  
9

## 10 11 12 **Methods**

13  
14  
15 The study design involved research assistants simulating clients to purchase ampoules of  
16 oxytocin and ergometrine from different types of points of sale. In an effort to design a  
17 representative sample of uterotonic points of sale, one district was selected from each of  
18 the three ecological regions of the country (coastal, forest, and savannah), which also  
19 differ on major socio-economic indicators.  
20  
21  
22  
23  
24  
25  
26  
27  
28

29 In August 2010 a research assistant traveled throughout the selected districts to compile a  
30 list including all pharmacies and chemical shops. In addition, he was asked to compile  
31 information on informal points of sale such as markets from which drugs might be  
32 purchased from stationed sellers and mobile drug peddlers. All efforts were made to  
33 compile an exhaustive list, acknowledging that this is nearly impossible given the  
34 informal and transient nature of some points of sale. Upon the research assistant's return  
35 to Accra, pharmacies and chemical shops in each district were consecutively numbered, a  
36 random start number was selected, and points of sale were systematically selected with a  
37 constant sampling interval until a sample of 25 points of sale were identified in each  
38 district. In Yendi and Kintampo North, all of the chemical shops and pharmacies  
39 identified during the listing exercise were selected for a visit.  
40  
41  
42  
43  
44  
45  
46  
47  
48  
49  
50  
51  
52  
53  
54  
55  
56  
57  
58  
59  
60

1  
2  
3 Two months later a team of nine research assistants simulated clients by visiting each  
4  
5 selected point of sale and requested drugs used by pregnant women to hasten their  
6  
7 delivery, adding that the drugs were needed for his/her sister, who was soon due to  
8  
9 deliver.  
10  
11

12  
13  
14  
15 There was no verbal or written informed consent for this study, as consent of the  
16  
17 salesperson would have undermined the simulation. If the salesperson requested a  
18  
19 prescription, the client provided a prescription for oxytocin and ergometrine, which was  
20  
21 obtained from a Ghana Health Service collaborator in Accra. This was done for two  
22  
23 reasons: (1) for human subjects purposes to avoid putting the salesperson in the position  
24  
25 of being asked to sell drugs to a client without a prescription even after the salesperson  
26  
27 had asked for one, and (2) to ensure a sufficient sample of ampoules for chemical assay  
28  
29 later. If the salesperson recommended that the client go elsewhere, the research assistants  
30  
31 substituted the recommended location for the selected site.  
32  
33  
34  
35  
36  
37  
38

39 Purchased ampoules were placed in plastic bags with coded information regarding the  
40  
41 date of purchase, expiry date of the ampoule, type of point of sale, and district name.  
42

43 These bags were placed in vaccine cold chain carriers just after purchase and were placed  
44  
45 in the cold room or refrigerator of the district hospital as quickly as possible and not later  
46  
47 than the evening of the day of purchase. Ampoules remained under refrigeration in the  
48  
49 district hospitals for 0 to 13 days before being transported in the cold chain to Accra. In  
50  
51 Accra, samples were refrigerated for up to one week, after which all samples were  
52  
53 submitted to the Ghana Food and Drugs Board. The Food and Drugs Board documented  
54  
55  
56  
57  
58  
59  
60

1  
2  
3 that all ampoules were delivered under cold chain conditions. Samples were refrigerated  
4  
5 until analysis.  
6  
7  
8  
9

10 Samples were analyzed according to the Finished Pharmaceutical Product specifications  
11  
12 of the British Pharmacopoeia, 2010 edition, as all the samples had the British  
13  
14 Pharmacopoeia as their specification. The United States Pharmacopeia chemical  
15  
16 reference standards for ergonovine maleate (ergometrine maleate) RS and oxytocin RS  
17  
18 were used as standard comparators in the analysis: for oxytocin, 46 oxytocin units per  
19  
20 vial, USP Reference Standard, Lot F1G134, Cat. No. 1491300; and for ergonovine  
21  
22 maleate, 100 mg, USP Reference Standard, Cat. No. 24000. The ampoules were tested  
23  
24 without blinding to product packaging, as information on the packaging is required for  
25  
26 testing. However, the manufacturer name was not included among assay results, as  
27  
28 required for ethical approval of the study.  
29  
30  
31  
32  
33  
34  
35  
36  
37

38 This study was approved by institutional review boards at the Ghana Health Service in  
39  
40 Accra, Ghana; PATH in Seattle, Washington; and the Johns Hopkins Bloomberg School  
41  
42 of Public Health in Baltimore, Maryland. All authors have completed the Unified  
43  
44 Competing Interest form at [www.icmje.org/coi\\_disclosure.pdf](http://www.icmje.org/coi_disclosure.pdf) (available on request from  
45  
46 the corresponding author) and declare that (1) CS, AK and EM have contract support  
47  
48 from PATH for the submitted work and that PC, BG and SB have grant support from the  
49  
50 Bill and Melinda Gates Foundation for the submitted work; no financial relationships  
51  
52 with any organisations that might have an interest in the submitted work in the previous  
53  
54  
55  
56  
57  
58  
59  
60

1  
2  
3 three years; no other relationships or activities that could appear to have influenced the  
4 submitted work; (2) CS, AK, PC, EM, BG and SB have no relationships with any  
5 companies that might have an interest in the submitted work in the previous three years;  
6  
7  
8  
9  
10 (3) their spouses, partners or children have no financial relationships that may be relevant  
11 to the submitted work; and (4) CS, AK, PC, EM, BG and SB have no non-financial  
12 interests that may be relevant to the submitted work. This research was supported by the  
13 Oxytocin Initiative project at PATH with funding from the Bill & Melinda Gates  
14 Foundation. The funders of the study had no role in the design, conduct, analysis,  
15 interpretation of study results, writing of this manuscript or the decision to submit the  
16 manuscript for publication. The authors had access to and full control of all primary data.  
17  
18  
19  
20  
21  
22  
23  
24  
25  
26  
27  
28  
29  
30  
31  
32  
33  
34  
35  
36  
37  
38  
39  
40  
41  
42  
43  
44  
45  
46  
47  
48  
49  
50  
51  
52  
53  
54  
55  
56  
57  
58  
59  
60

The study was undertaken by PATH, the Johns Hopkins Bloomberg School of Public Health and the Regional Institute for Population Studies at the University of Ghana.

## Results

Descriptive statistics for the study districts are provided in Table 1. Yendi District is located in the Northern Region and is socio-economically disadvantaged relative to the other two districts. Socio-economic indicators for Kintampo North in Brong-Ahafo Region fall between those of the Northern and Western Regions in which Ahanta West District is located (9).

INSERT TABLE 1 HERE

1  
2  
3  
4  
5  
6 Sixty-nine visits to formal points of sale and 21 visits to informal points of sale were  
7  
8 made in total. Formal points of sale included private pharmacies, chemical shops, and  
9  
10 public health facility pharmacies. Informal points of sale included market places, mobile  
11  
12 peddlers, and herbal or home clinics. Although the original plan was to restrict sampling  
13  
14 to private points of sale, salespeople occasionally either declined to sell uterotonic drugs  
15  
16 or did not have any to sell, and recommended that the client go to the nearby public  
17  
18 health facility pharmacy. Thus, as described in Table 2, 10% of the 69 commercial points  
19  
20 of sale visited were public health facility pharmacies. Eighty-three percent of visits to  
21  
22 formal points of sale were to chemical shops, with only 7% to private pharmacies. In  
23  
24 Kintampo North and Yendi districts, all chemical shops identified during the August  
25  
26 listing exercise were visited except for two—one due to inaccessible roads and one which  
27  
28 was closed for the duration of fieldwork. In Ahanta West, research assistants went to  
29  
30 pharmacies across district lines at the recommendation of a salesperson. Half of the  
31  
32 informal points of sale were mobile peddlers (11 of 21), followed by market places (8 of  
33  
34 21). The list of informal points of sale which were visited, however, was opportunistic.  
35  
36  
37  
38  
39  
40  
41  
42

43 INSERT TABLE 2 HERE  
44  
45  
46  
47

48 A total of 101 ampoules were collected via the simulated client exercise: 46 ampoules of  
49  
50 oxytocin 10 IU and 55 ampoules of ergometrine 0.5 mg. Tables 3 and 4 present the  
51  
52 percent distribution of purchased ampoules of oxytocin and ergometrine by district and  
53  
54 by type of point of sale, respectively. Only 15% of the ampoules purchased were from  
55  
56  
57  
58  
59  
60



1  
2  
3 Yendi district, with approximately 42% each purchased by the teams in Ahanta West and  
4  
5 Kintampo North. To note, there are no pharmacies in Ahanta West District, the four  
6  
7 pharmacies visited by the simulated clients from Ahanta West were in a neighboring  
8  
9 district to which they were referred. Approximately one third of the 101 ampoules were  
10  
11 purchased from chemical sellers, who in theory are not licensed to sell uterotonic drugs.  
12  
13 More than one in five ampoules (22%) were purchased in public health facility  
14  
15 pharmacies. In most cases, the simulated clients purchased one ampoule each of  
16  
17 ergometrine and oxytocin. At four points of sale, simulated clients were sold five  
18  
19 ampoules of both drugs and at one site they were sold ten ergometrine ampoules.  
20  
21  
22  
23  
24  
25  
26

27 Products other than injectable uterotonics were offered to and purchased by the simulated  
28  
29 clients, including ergometrine tablets, misoprostol and Buscopan (used for labor  
30  
31 induction in some settings). None of these products were tested for active ingredients. No  
32  
33 uterotonics were successfully purchased from mobile peddlers, herbal/home clinics, or  
34  
35 markets. A variety of black or red powders or dark-colored roots were purchased from  
36  
37 mobile peddlers in response to the simulated client's request for a product that would  
38  
39 hasten labor. Traditional preparations were not tested for uterotonic properties.  
40  
41  
42  
43  
44  
45

46 INSERT TABLES 3 and 4 HERE  
47  
48  
49

50 Table 5 presents the distribution of the percentage of active ingredient in the purchased  
51  
52 ampoules of oxytocin and ergometrine. Among the 46 oxytocin ampoules, 26% (11  
53  
54 ampoules) met British Pharmacopoeia specifications, showing 90%–110% active  
55  
56  
57  
58  
59  
60

1  
2  
3 ingredient. Only 4% (2 ampoules) of oxytocin ampoules had expired. None of the 55  
4  
5 ergometrine ampoules met the British Pharmacopoeia specification with a level of active  
6  
7 ingredient between 90% and 110%. Seventy-six percent of the ergometrine ampoules  
8  
9 showed less than 60% active ingredient. One ergometrine ampoule showed 0% active  
10  
11 ingredient and one showed 120% active ingredient. None of the ergometrine ampoules  
12  
13 had expired. The median percentages of active ingredients were 64% and 50% percent for  
14  
15 oxytocin and ergometrine, respectively.  
16  
17  
18  
19  
20  
21

22 INSERT TABLE 5 HERE  
23  
24  
25  
26

27 Figures 1 and 2 illustrate the number of ampoules of oxytocin and ergometrine by in-  
28  
29 country registration status of the product and by type of point of sale. None of the  
30  
31 oxytocin ampoules purchased were from a registered manufacturer of oxytocin. Eighteen  
32  
33 of the oxytocin samples (39%) were from manufacturers whose registration status was  
34  
35 pending, and 28 (61%) were from unregistered manufacturers of oxytocin. Unregistered  
36  
37 oxytocin was purchased from chemical shops, private pharmacies, and public health  
38  
39 facility pharmacies. All of the oxytocin ampoules from unregistered manufacturers were  
40  
41 outside specification for active ingredient. One third of the oxytocin ampoules from  
42  
43 manufacturers with pending registration status were outside specification for active  
44  
45 ingredient (data not shown).  
46  
47  
48  
49  
50  
51

52  
53 For ergometrine, 17 ampoules (31%) were from registered manufacturers of ergometrine,  
54  
55 11 (20%) were from manufacturers whose registration status was pending, and 27 (49%)  
56  
57  
58  
59  
60

1  
2  
3 were from unregistered manufacturers of ergometrine (including the ampoule with 0%  
4 active ingredient). As with oxytocin, unregistered ergometrine was purchased from all  
5 types of points of sale. All ergometrine ampoules were outside specification for active  
6 ingredient.  
7  
8  
9  
10  
11  
12  
13

14  
15 INSERT FIGURES 1 and 2 HERE  
16  
17  
18  
19

20 It was not possible to quantify results regarding the need for a prescription to purchase  
21 uterotonics. In some cases, salespeople made vague mention of the need for a  
22 prescription, but never actually requested one, or they asked for a prescription but never  
23 looked at it. Where prescriptions were requested, all were given back to the simulated  
24 client. In some cases where clients were referred to a public health facility pharmacy, the  
25 simulation ceased and a health care provider accompanied the research assistant to the  
26 facility pharmacy. In short, it appears that it was common but not universal that the  
27 salesperson requested a prescription. The research assistants also noted that salespeople  
28 often assumed they were interested in uterotonic drugs for abortion purposes, despite  
29 their story about a woman who was soon to deliver.  
30  
31  
32  
33  
34  
35  
36  
37  
38  
39  
40  
41  
42  
43  
44  
45

## 46 Discussion

47  
48 Four messages resound from the analysis of this exploratory study: (1) quality of  
49 uterotonics is likely a serious problem, at least in these districts in Ghana; 89% of all  
50 ampoules tested in this study did not meet the specifications for active ingredient; (2) the  
51 low level of active ingredient in these ampoules is not due to old drugs; only 2% of these  
52  
53  
54  
55  
56  
57  
58  
59  
60

1  
2  
3 ampoules had expired; (3) there is little enforcement of the restriction against chemical  
4 shops selling uterotonics or of the sale of unregistered uterotonics in these districts; and  
5  
6  
7  
8 (4) inactive uterotonics are not restricted to the private sector; uterotonics outside  
9  
10 specification were purchased from private and public sources. It is also clear that public  
11 and private sources procure unregistered uterotonics. It was not possible to quantify  
12  
13 results on the need for a prescription to purchase uterotonics, though in many cases the  
14  
15 client was at least vaguely asked for a prescription.  
16  
17  
18  
19  
20  
21

22 There are a number of strengths and limitations to this study. Strengths include the fact  
23 that an up-to-date listing of points of sale was compiled specifically for this study; a  
24 sample of randomly selected sites was visited; and in two of three districts the selected  
25  
26 points of sale represented all the existing, accessible chemical sellers and pharmacies.  
27  
28 The simulated client approach would also have prevented possible bias in the selection of  
29  
30 ampoules for testing. Limitations include the fact that the sampling frame may not have  
31  
32 been 100% exhaustive, given the informal nature of some drug sellers, and that the  
33  
34 number of points of sale selected for visit (25 per district) was based on practical  
35  
36 considerations and resulted in a relatively small sample of ampoules available for  
37  
38 chemical testing. Study results were strikingly similar across three diverse districts,  
39  
40 however, and this is unlikely to result from sampling error. Some misclassification  
41  
42 between chemical sellers and pharmacies was also possible, as shops were classified  
43  
44 based on their exterior signage. As simulated clients, the research assistants could not ask  
45  
46 questions regarding a shop's licenses or the qualifications of the sales-person.  
47  
48  
49  
50  
51  
52  
53  
54  
55  
56  
57  
58  
59  
60

1  
2  
3 Study results were shared with the Ghana Food and Drugs Board and other interested  
4  
5 parties and clearly warrant in-depth investigation by both the Food and Drugs Board and  
6  
7 the Ghana Health Service. The difficulties of the Ghana Food and Drugs Board in  
8  
9 monitoring and addressing counterfeit and substandard drugs have been highlighted in a  
10  
11 recent private health sector assessment by the World Bank (11). A 2010 evaluation of the  
12  
13 efforts of the Medicines Transparency Alliance (META) in Ghana includes among its ten  
14  
15 recommendations that each META Governing Council meeting should include discussion  
16  
17 of a specific substantive drug-related issue and that these discussions should be informed  
18  
19 by a fact sheet of existing information developed specifically for this purpose (9). The  
20  
21 results of this study strongly support development of a fact sheet on uterotonic drug  
22  
23 quality by the META Governing Council, as well as consideration of including one or  
24  
25 more uterotonic drugs on the list of tracer drugs in Ghana. The common and accepted  
26  
27 practice by public health facilities of purchasing additional drugs on the private market  
28  
29 when centrally distributed stocks are low requires closer monitoring by the Ghana Health  
30  
31 Service to prevent the purchase of unregistered drugs.  
32  
33  
34  
35  
36  
37  
38  
39  
40

41 This study also raises a host of questions which are not specific to Ghana. For example,  
42  
43 given the need for additional data on uterotonic drug quality in poor countries, which  
44  
45 approaches to data collection and sampling should be promoted and for which objectives?  
46  
47 Simulated clients were used in this study to ensure an unbiased selection of ampoules for  
48  
49 chemical testing and to assess how well pharmacies follow existing regulations requiring  
50  
51 a prescription for the sale of uterotonic drugs. An important consequence of using  
52  
53 simulated clients, however, is that it precludes data collection on why ampoules were out  
54  
55  
56  
57  
58  
59  
60

1  
2  
3 of specification for active ingredients. In the absence of information on drug quality at  
4  
5 manufacture and packaging, and storage conditions along the distribution chain, it is not  
6  
7 possible to determine whether the cause is counterfeit, substandard, or degraded drugs.  
8  
9  
10 Although it is likely that at least one reason for the low percentages of active ingredients  
11  
12 is unrefrigerated storage (for both oxytocin and ergometrine) and/or exposure to light (for  
13  
14 ergometrine), one does not know at which points along the distribution chain this may  
15  
16 have occurred. These limitations should be seriously considered when deciding on study  
17  
18 design. Finally, the study also raises the question of which uterotonic drugs should be  
19  
20 tested. In this study, it was considered unnecessary to test misoprostol. However, given  
21  
22 the rapid expansion of the availability of and demand for misoprostol, particularly in  
23  
24 South and Southeast Asia (12), counterfeit misoprostol is likely to become a problem and  
25  
26 should be considered for inclusion in future studies.  
27  
28  
29  
30  
31  
32  
33

34 The results of this study are sufficient to raise serious concerns regarding the quality of  
35  
36 oxytocin and ergometrine, particularly at the peripheral level in Ghana, and potentially in  
37  
38 other low-income countries. While efforts to reduce maternal mortality have focused on  
39  
40 training health workers to prevent and treat postpartum haemorrhage, these efforts and  
41  
42 resources are undermined if health workers do not have access to high-quality uterotonics.  
43  
44 These results suggest that any focused postpartum haemorrhage reduction strategy also  
45  
46 requires ongoing surveillance of uterotonic drugs, enforcement of drug registration and  
47  
48 pharmaceutical licensing regulations, and increased attention to drug storage and  
49  
50 procurement. Post-marketing surveillance of drug quality in low income countries is  
51  
52 often restricted to disease-specific, well-financed health programs such as those that rely  
53  
54  
55  
56  
57  
58  
59  
60

1  
2  
3  
4  
5  
6  
7  
8  
9  
10  
11  
12  
13  
14  
15  
16  
17  
18  
19  
20  
21  
22  
23  
24  
25  
26  
27  
28  
29  
30  
31  
32  
33  
34  
35  
36  
37  
38  
39  
40  
41  
42  
43  
44  
45  
46  
47  
48  
49  
50  
51  
52  
53  
54  
55  
56  
57  
58  
59  
60

on anti-retrovirals, antibiotics and anti-malarial drugs. Maternal health programs must adopt and fund the same approach to drug quality as is standard in programs addressing infectious disease.

For peer review only

## References

1. WHO. WHO Model List of Essential Medicines; 16th list (updated). Geneva; 2010 [updated 2010; cited]; Available from:  
<http://www.who.int/medicines/publications/essentialmedicines/en/index.html>.
2. WHO. WHO Statement regarding the use of misoprostol for Postpartum Haemorrhage prevention and treatment. Geneva: Department of Reproductive Health and Research. 2009.
3. WHO. WHO List of Priority Medicines for Mothers and Children. Department of Maternal, Newborn, Child and Adolescent Health. 2011.
4. Stability of injectable oxytocics in tropical climates; Results of field surveys and simulation studies on ergometrine, methylergometrine and oxytocin [database on the Internet]. Action Program on Essential Drugs; World Health Organisation, Geneva. 1993
5. de Groot AN, Hekster YA, Vree TB, van Dongen PW. Ergometrine and methylergometrine tablets are not stable under simulated tropical conditions. *J Clin Pharm Ther.* 1995 Apr;20(2):109-13.
6. de Groot AN, Hekster YA, Vree TB, van Dongen PW. Oxytocin and desamino-oxytocin tablets are not stable under simulated tropical conditions. *J Clin Pharm Ther.* 1995 Apr;20(2):115-9.
7. Hogerzeil HV, Battersby A, Srdanovic V, Stjernstrom NE. Stability of essential drugs during shipment to the tropics. *BMJ.* 1992 Jan 25;304(6821):210-2.
8. Nazerali H, Hogerzeil HV. The quality and stability of essential drugs in rural Zimbabwe: controlled longitudinal study. *BMJ.* 1998 Aug 22;317(7157):512-3.



- 1  
2  
3 9. Waddington CM, Coleman, NA. Evaluation of the MeTA Phase 1 2009-2010;  
4  
5  
6 Ghana Country Report. London: HLSP; 2010.
- 7  
8 10. Ghana Health Service, Ghana Statistical Service, Macro International. Ghana  
9  
10 Maternal Health Survey, 2007. Calverton, Maryland USA; 200.
- 11  
12 11. Makinen MS, S. Bitran, R. Adjei, S. Munoz, R. Private Health Sector Assessment  
13  
14 in Ghana. Washington DC: The World Bank; 2010 Contract No.: Document Number|.
- 15  
16  
17 12. Fernandez MM, Coeytaux F, de Leon RG, Harrison DL. Assessing the global  
18  
19 availability of misoprostol. Int J Gynaecol Obstet. 2009 May;105(2):180-6.
- 20  
21  
22  
23  
24  
25  
26  
27  
28  
29  
30  
31  
32  
33  
34  
35  
36  
37  
38  
39  
40  
41  
42  
43  
44  
45  
46  
47  
48  
49  
50  
51  
52  
53  
54  
55  
56  
57  
58  
59  
60

Table 1. Regional socio-economic indicators for study districts;

| Characteristics                                       | Northern<br>Region<br>(Yendi)<br>(%) | Brong-<br>Ahafo<br>(Kintampo<br>North)<br>(%) | Western<br>Region<br>(Ahanta West)<br>(%) |
|-------------------------------------------------------|--------------------------------------|-----------------------------------------------|-------------------------------------------|
| % of reproductive aged women with no education        | 67.5                                 | 27.7                                          | 19.0                                      |
| % of women using modern contraception                 | 7.3                                  | 17.5                                          | 19.9                                      |
| % of births assisted by a medically trained attendant | 27.3                                 | 56.9                                          | 53.6                                      |

Source: (10)

Table 2. Numbers and percent distribution of the points of sale visited by simulated clients by district

|                                     | District |                   |             |       |         |
|-------------------------------------|----------|-------------------|-------------|-------|---------|
|                                     | Yendi    | Kintampo<br>North | Ahanta West | Total | Total % |
| Number of Commercial Points of Sale |          |                   |             |       | %       |
| Private Pharmacies                  | 0        | 1                 | 4*          | 5     | 7.3     |
| Chemical Shops/Sellers              | 23       | 17                | 17          | 57    | 82.6    |
| Public Health Facility Pharmacies   | 6        | 1                 | 0           | 7     | 10.1    |
| Total                               | 29       | 19                | 21          | 69    | 100.0   |
| Number of Informal Points of Sale   |          |                   |             |       | %       |
| Markets                             | 2        | 5                 | 1           | 8     | 38.1    |
| Home/Herbal Clinics                 | 1        | 0                 | 1           | 2     | 9.5     |
| Mobile Peddlers                     | 4        | 3                 | 4           | 11    | 52.4    |
| Total                               | 7        | 8                 | 6           | 21    | 100.0   |

\*All pharmacies were located outside of Ahanta West in a contiguous district.

Table 3. Percent distribution of purchased oxytocin and ergometrine ampoules by district

| District    | Oxytocin (%) | Ergometrine (%) |
|-------------|--------------|-----------------|
| Yendi       | 15.2         | 14.5            |
| Kintampo    | 30.4         | 51.0            |
| Ahanta West | 52.2         | 34.5            |
| Missing     | 2.2          | 0.0             |
| Total % (N) | 100 (46)     | 100.0 (55)      |

Table 4. Percent distribution of purchased oxytocin and ergometrine ampoules by type of point of sale

| Source of purchase                | Oxytocin (%) | Ergometrine (%) |
|-----------------------------------|--------------|-----------------|
| Private Pharmacies                | 32.6         | 58.2            |
| Chemical Shops/Sellers            | 39.1         | 23.6            |
| Public Health Facility Pharmacies | 26.1         | 18.2            |
| Missing                           | 2.2          | 0.0             |
| Total % (N)                       | 100.0 (46)   | 100.0 (55)      |

Table 5. Percent distribution of the assay percentage of active ingredient in purchased ampoules of oxytocin and ergometrine

| Assay percentage | Oxytocin 10 IU (%) | Ergometrine 0.5 mg (%) |
|------------------|--------------------|------------------------|
| 0%               | 0.0                | 1.8                    |
| 1%–39%           | 23.9               | 23.7                   |
| 40%–59%          | 8.7                | 50.8                   |
| 60% –89%         | 41.3               | 21.9                   |
| 90% –110%        | 26.1               | 0.0                    |
| >110%            | 0.0                | 1.8                    |
| Total (N)        | 100.0 (46)         | 100.0 (55)             |
| Median %         | 64.0               | 50.5                   |
| Percent expired  | 4.3 (2)            | 0.0 (0)                |

**Contributors:**

The authors wish to acknowledge the contributions of Stephen Kwankye, Delali Badasu, Kamil Fuseini, Henry Tagoe, Adriana Biney, and Nanaa Boakye of the Regional Institute for Population Studies for assisting with data collection. We also recognize John Gyapong (Ghana Health Service) and Gloria Quansah-Asare (Ghana Ministry of Health) for their support throughout the implementation and analysis phases of the study. We acknowledge Deborah Armbruster, formerly of PATH, for her contribution to the initiation and design of the Oxytocin Initiative and Alice Levisay and Sadaf Khan of PATH for their assistance in the editing of this manuscript.

**Author Contributions:**

CS assisted in the design of the study, analyzed the data, and wrote the first draft of the paper. AK, PC, and EM assisted with the design of the study, oversaw data collection, and assisted with editing the paper. BG and SB provided technical guidance throughout the study, particularly regarding potency testing of the uterotonic drugs, and assisted with the editing of the paper.

**Copyright/license for publication:**

The corresponding author has the right to grant on behalf of all authors and does grant on behalf of all authors, an exclusive license on a worldwide basis to the BMJ Publishing Group Ltd and its licensees, to permit this article (if accepted) to be published in BMJ editions and any other MBJPG products and to exploit all subsidiary rights, as set out in

1  
2  
3 our licence ([http://resources.bmj.com/bmj/authors/checklists-forms/licence-for-](http://resources.bmj.com/bmj/authors/checklists-forms/licence-for-publication)  
4  
5 [publication](http://resources.bmj.com/bmj/authors/checklists-forms/licence-for-publication)).  
6  
7  
8  
9

### 10 **Appendix 1:**

11  
12 The design, documentation and reporting of results for this study follows the STROBE  
13  
14 guidelines for the reporting of observational studies.  
15  
16  
17  
18  
19  
20  
21  
22  
23  
24  
25  
26  
27  
28  
29  
30  
31  
32  
33  
34  
35  
36  
37  
38  
39  
40  
41  
42  
43  
44  
45  
46  
47  
48  
49  
50  
51  
52  
53  
54  
55  
56  
57  
58  
59  
60



January 4, 2012

**STROBE CHECKLIST:** For manuscript # BMJ.2011.001082**Title:** Uterotonic Drug Quality: An Assessment of the Potency of Injectable Uterotonic Drugs Purchased by Simulated Clients in Three Districts in Ghana

| Item                         | Item # | Recommendation                                                                                                                                   | Description of Manuscript Content                                                                                                                                                                                                                                                                                     |
|------------------------------|--------|--------------------------------------------------------------------------------------------------------------------------------------------------|-----------------------------------------------------------------------------------------------------------------------------------------------------------------------------------------------------------------------------------------------------------------------------------------------------------------------|
| <b>Title and Abstract</b>    | 1      | Study design indicated with commonly used terms in title or abstract;<br>Provide in abstract informative/balanced summary of methods and results | Our title describes study design: Uterotonic Drug Quality: An Assessment of the Potency of Injectable Uterotonic Drugs Purchased by Simulated Clients in Three Districts in Ghana;<br>Study Method is described in non-technical language. Basic results are provided regarding the potency of the two drugs studied. |
| <b>Introduction</b>          |        |                                                                                                                                                  |                                                                                                                                                                                                                                                                                                                       |
| Background/<br>rationale     | 2      | Explain the scientific background and the rationale for the study                                                                                | The introduction summarizes the use of uterotonic drugs in poor countries, the current programmatic priority for postpartum hemorrhage prevention and previous studies of uterotonic quality. Pages 5-6                                                                                                               |
| Objectives                   | 3      | State objectives and pre-specified hypotheses                                                                                                    | 2 objectives are clearly specified. There were no pre-specified hypotheses re: results. See 1 <sup>st</sup> paragraph of page 7                                                                                                                                                                                       |
| <b>Methods</b>               |        |                                                                                                                                                  |                                                                                                                                                                                                                                                                                                                       |
| Study design                 | 4      | Present key elements of study design                                                                                                             | Detailed steps of the study design are presented in chronological order. See pages 7 – 1 <sup>st</sup> 2 paragraphs of page 9.                                                                                                                                                                                        |
| Setting                      | 5      | Describe setting, relevant dates, recruitment, follow up and data collection                                                                     | On pages 7 and 8, the dates of the sampling frame compilation and data collection are provided. Data collection procedures, drug handling procedures and details regarding the chemical assays are provided on pages 7-9;                                                                                             |
| Participants                 | 6      | Cross-sectional study: provide eligibility criteria and sources and methods for the selection of participants                                    | In this study, sample selection of facilities replaces eligibility criteria for study participants. As described on page 7, in 2 of 3 districts, all pharmacies identified in the sampling frame were eventually selected to participate in the study.                                                                |
| Variables                    | 7      | Clearly define all outcomes, predictors, etc.                                                                                                    | The main outcome is the percent of active ingredient in the drug assayed, and it is compared against manufacturer specification (described on pages 12-13). Other variables are simple descriptors: region, pharmacy type and registration status – which are all self-explanatory.                                   |
| Data sources/<br>measurement | 8      | Provide sources of data and                                                                                                                      | The chemical assays are described in detail. See page 9.                                                                                                                                                                                                                                                              |

| Item                   | Item # | Recommendation                                                                                                          | Description of Manuscript Content                                                                                                                                                                                                                                                                                                                                                                                                                                                                          |
|------------------------|--------|-------------------------------------------------------------------------------------------------------------------------|------------------------------------------------------------------------------------------------------------------------------------------------------------------------------------------------------------------------------------------------------------------------------------------------------------------------------------------------------------------------------------------------------------------------------------------------------------------------------------------------------------|
|                        |        | measurement methods                                                                                                     |                                                                                                                                                                                                                                                                                                                                                                                                                                                                                                            |
| Bias                   | 9      | Describe efforts to assess sources of bias                                                                              | The simulated client method prevents bias in the selection of ampoules chosen for chemical assay since the pharmacists/drug seller does not know that the drugs will be tested (2 <sup>nd</sup> paragraph, page 15). The authors discuss possible bias due to a sampling frame that may not have been 100% complete due to the informal nature of some points of drug sale. However, they note that the results are so overwhelmingly similar that they are unlikely to have resulted from sampling error. |
| Study size             | 10     | Explain how study size was arrived at                                                                                   | The Methods section describes the plan of selecting 25 points of sale in each district. In the Discussion, this sampling plan, which was based on practical and budgetary considerations and resulted in a relatively small sample size is cited as a limitation of the study. However, the overall sample (101 ampoules) in this study does not compare unfavorably to existing community-based studies identified in the literature.                                                                     |
| Quantitative variables | 11     | Explain how quantitative variables were handled, grouped and the rationale for grouping                                 | The key outcome variable (% active ingredient) was compared against the manufacturer's specifications (90%-110%). Additional groupings (0%, 1-39, 40-59, 60-89%) were selected simply to show the distribution. 0% was shown to identify possible cases of counterfeit drug.                                                                                                                                                                                                                               |
| Statistical methods    | 12     | Describe all statistical methods                                                                                        | As stated in the Methods section, only simple descriptive statistics are used in this paper (% distributions, means). There was no reason to assess confounders in this observational study based on our objectives. Missing data are shown in the tables.                                                                                                                                                                                                                                                 |
| <b>Results</b>         |        |                                                                                                                         |                                                                                                                                                                                                                                                                                                                                                                                                                                                                                                            |
| Participants           | 13     | Report n of participants at each stage of the study; Give reasons for non-participation, Consider use of a flow diagram | As described in #6 above, the selection of points of sale replaces recruitment of study participants in this study. Our sampling procedure is described under Methods and the results of our sampling procedure is described under Results (see page 11).                                                                                                                                                                                                                                                  |
| Descriptive data       | 14     | Give characteristics of study participants, indicate participants with missing data                                     | In this case, points of sale are the equivalent of study participants, and within points of sale, ampoules were selected for assay. Points of sale are described by region (no missing data) and type (data were missing on type of point of sale for 1 ampoule – this is noted in Tables 3 and 4.)                                                                                                                                                                                                        |

| Item                     | Item # | Recommendation                                                                                                          | Description of Manuscript Content                                                                                                                                                                                                                                                                                                                                     |
|--------------------------|--------|-------------------------------------------------------------------------------------------------------------------------|-----------------------------------------------------------------------------------------------------------------------------------------------------------------------------------------------------------------------------------------------------------------------------------------------------------------------------------------------------------------------|
| Outcome data             | 15     | Cross-sectional study: Report numbers of outcomes events or summary measures                                            | N's and percentages and means are presented for potency; that is, outcome data on the % of active ingredient in each ampoule.                                                                                                                                                                                                                                         |
| Main results             | 16     | Report n of participants at each stage of the study; Give reasons for non-participation; Consider use of a flow diagram | As described in #6 above, the selection of points of sale replaces recruitment of study participants in this study. Our sampling procedure is described under Methods and the results of our sampling procedure are described under Results (see page 11). The n's for all ampoules tested are shown in Tables 4 and 5.                                               |
| Other analyses           | 17     | Report on other analyses conducted (sub-group, etc)                                                                     | No additional analyses were conducted.                                                                                                                                                                                                                                                                                                                                |
| <b>Discussion</b>        |        |                                                                                                                         |                                                                                                                                                                                                                                                                                                                                                                       |
| Key results              | 18     | Summarize key results with reference to study objectives                                                                | The key results are summarized in four concise statements in the first paragraph of the Discussion section.                                                                                                                                                                                                                                                           |
| Limitations              | 19     | Discuss limitations of the study, including possible biases, imprecision and direction and magnitude of such            | Possible biases are discussed in the 1 <sup>st</sup> paragraph of page 15 (including the low likelihood that an incomplete sampling frame could have qualitatively changed the key results). The fact that it was not possible to address one of our objectives (ie, quantify results for the need for a prescription for uterotonic drugs) is also discussed openly. |
| Interpretation           | 20     | Give a cautious overall interpretation considering objectives, results form similar studies and other relevant evidence | The results are presented as: uterotonic drug quality is likely a serious problem in these three districts. There is no other comparable evidence from Ghana against which one can compare these results. However, reports referring to other types of low quality drugs in Ghana are cited.                                                                          |
| Generalizability         | 21     | Discuss generalizability of study results                                                                               | Authors were cautious in over-interpreting generalizability of results regarding drug quality in this paper. However, the authors do draw attention to issues discussed in this paper regarding drug quality study design which are generalizable to other poor countries.                                                                                            |
| <b>Other information</b> |        |                                                                                                                         |                                                                                                                                                                                                                                                                                                                                                                       |
| unding                   | 22     | Provide source of funding and role of funders                                                                           | A statement regarding the funding of the study and the role of the funders is included on page 10, in the paragraph preceding Results.                                                                                                                                                                                                                                |

1  
2  
3  
4  
5  
6  
7  
8  
9  
10  
11  
12  
13  
14  
15  
16  
17  
18  
19  
20  
21  
22  
23  
24  
25  
26  
27  
28  
29  
30  
31  
32  
33  
34  
35  
36  
37  
38  
39  
40  
41  
42  
43  
44  
45  
46  
47  
48  
49  
50  
51  
52  
53  
54  
55  
56  
57  
58  
59  
60

For peer review only

1  
2  
3  
4  
5  
6  
7  
8  
9  
10  
11  
12  
13  
14  
15  
16  
17  
18  
19  
20  
21  
22  
23  
24  
25  
26  
27  
28  
29  
30  
31  
32  
33  
34  
35  
36  
37  
38  
39  
40  
41  
42  
43  
44  
45  
46  
47  
48  
49  
50  
51  
52  
53  
54  
55  
56  
57  
58  
59  
60

Figure 1. Number of purchased ampoules of oxytocin by in-country registration status of the product and by type of point of sale

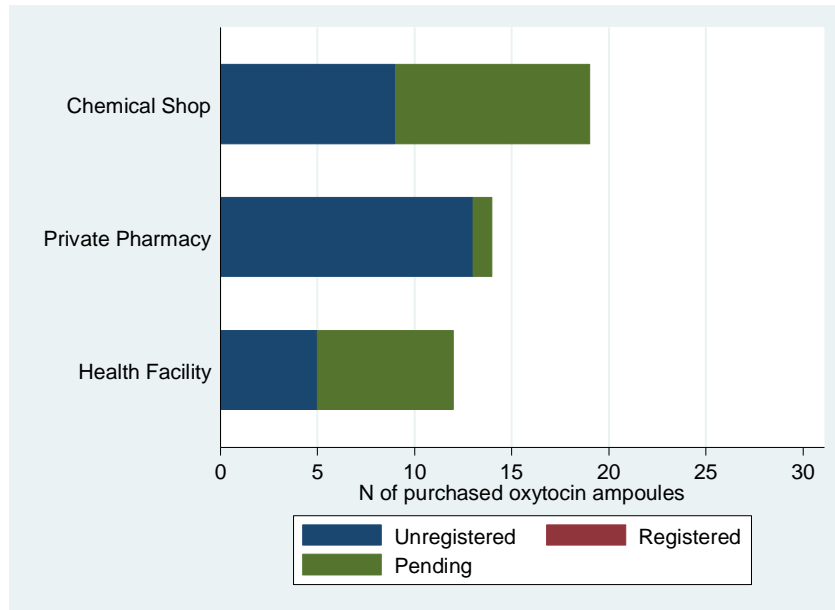

review only

Figure 2. Number of purchased ampoules of ergometrine by in-country registration status of the product and by type of point of sale

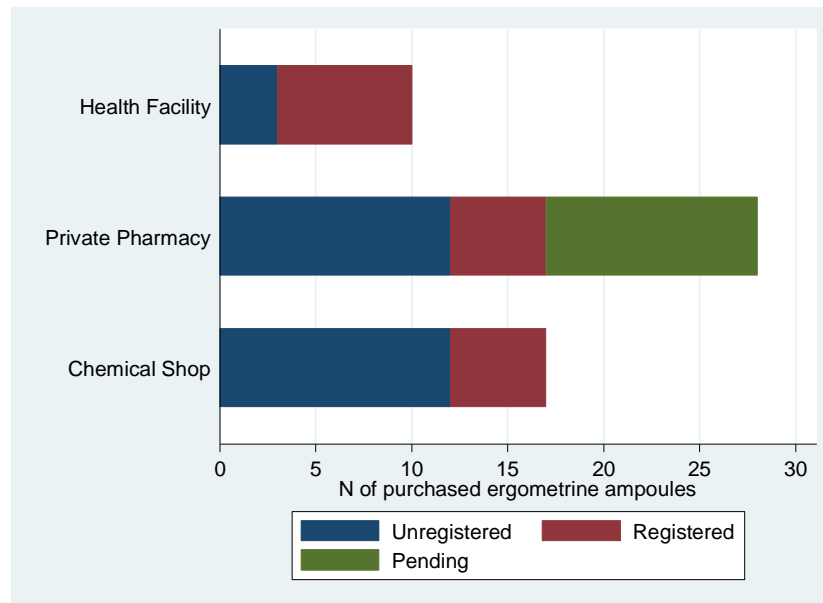

Supplement: bmjopen-2011-000431.draft_revisions.pdf [file bmjopen-2011-000431.draft_revisions.pdf]
